# Supplementary material for: Transcriptome Analysis Reveals Signature of Adaptation to Landscape Fragmentation
Source: PLoS One. 2014 Jul 2;9(7):e101467. doi: 10.1371/journal.pone.0101467 (PMC4079591; doi:10.1371/journal.pone.0101467)
Supplement: Table S5 — Genes in Wnt, Notch and hedgehog signaling pathways. (XLSX) [file pone.0101467.s009.xlsx]

## Sheet: Sheet1
Table S5. Genes in Wnt, Notch and Hedgehog signalling pathways.
Potential Melitaea cinxia genes with blastx matches (bitscore>=100) to Drosophila melanogaster genes in the three signalling pathways.
Wnt signalling pathway
					Avarage log2 expression				permutation test
NAME	SYMBOL	e-value	bitscore	GeneID: MCINX_	Åland	Uppland	Saaremaa	Öland	P value	FDR	Description	GO term	KEGG entry	Dmel Flybase ID
frizzled 3	fz3	2e-33	144	012998	3.65894	3.2598	2.23821	2.55271	0	0	Putative class D atypical G-protein coupled receptor GPRfz5	GO:0003674 GO:0004871 GO:0004872 GO:0004888 GO:0004930 GO:0005575 GO:0005623 GO:0007154 GO:0007165 GO:0007166 GO:0007186 GO:0007275 GO:0008150 GO:0009987 GO:0016020 GO:0016021 GO:0016055 GO:0023052 GO:0031224 GO:0032501 GO:0032502 GO:0038023 GO:0044425 GO:0044464 GO:0050789 GO:0050794 GO:0050896 GO:0051716 GO:0060089 GO:0065007
Protein C kinase 53E	Pkc53E	5e-22	107	002031	5.66719	5.46275	5.20565	5.2952	0	0	Ribosomal protein S6 kinase beta-1	GO:0000003 GO:0000082 GO:0000166 GO:0000267 GO:0000278 GO:0001101 GO:0002237 GO:0003006 GO:0003008 GO:0003009 GO:0003012 GO:0003674 GO:0003824 GO:0004435 GO:0004620 GO:0004629 GO:0004672 GO:0004674 GO:0004711 GO:0005488 GO:0005515 GO:0005524 GO:0005575 GO:0005622 GO:0005623 GO:0005624 GO:0005625 GO:0005626 GO:0005634 GO:0005737 GO:0005739 GO:0005740 GO:0005741 GO:0005829 GO:0005840 GO:0006417 GO:…	map04012 map04150 map04350 map04666 map04910 map05221	FBgn0015806
Rho-kinase	rok	5e-37	157	007405	6.33526	6.61183	6.85768	6.69126	0	0	Serine/threonine-protein kinase 38-like	GO:0000166 GO:0000287 GO:0003674 GO:0003779 GO:0003824 GO:0004672 GO:0004674 GO:0004697 GO:0005488 GO:0005515 GO:0005524 GO:0005575 GO:0005622 GO:0005623 GO:0005634 GO:0005737 GO:0005856 GO:0006464 GO:0006468 GO:0006793 GO:0006796 GO:0007154 GO:0007165 GO:0007243 GO:0007275 GO:0007399 GO:0008092 GO:0008150 GO:0008152 GO:0009987 GO:0010975 GO:0015629 GO:0016020 GO:0016301 GO:0016310 GO:0016740 GO:…
microtubule star	mts	1e-34	147	011053	0.288418	0.598736	0.868165	0.841474	9e-05	0.00126484	Serine/threonine-protein phosphatase	GO:0003674 GO:0003824 GO:0004721 GO:0006793 GO:0006796 GO:0008150 GO:0008152 GO:0009987 GO:0016311 GO:0016787 GO:0016788 GO:0016791 GO:0042578 GO:0044237
Protein phosphatase 2A at 29B	Pp2A-29B	3e-112	406	012441	7.24411	7.34482	6.89436	7.14884	8.91e-05	0.00126484	Phosphatase PP2A regulatory subunit A	GO:0003674 GO:0005488 GO:0005575 GO:0005622 GO:0005623 GO:0005737 GO:0006810 GO:0006996 GO:0008150 GO:0009987 GO:0016043 GO:0016192 GO:0032991 GO:0043234 GO:0044424 GO:0044444 GO:0044464 GO:0051179 GO:0051234 GO:0051641 GO:0051649 GO:0071840 GO:0071841 GO:0071842	map03015 map04111 map04113 map04114 map04310 map04350 map04530 map04728 map04730 map05142 map05160	FBgn0260439
supernumerary limbs	slmb	8e-21	102	007409	5.19926	5.38246	5.65243	5.52819	9.09e-05	0.00126484	Tbl3	GO:0003674 GO:0004871 GO:0005057 GO:0005575 GO:0005622 GO:0005623 GO:0005634 GO:0005730 GO:0006139 GO:0006364 GO:0006396 GO:0006807 GO:0007154 GO:0007165 GO:0007166 GO:0007186 GO:0007187 GO:0007199 GO:0008150 GO:0008152 GO:0009987 GO:0010467 GO:0016070 GO:0016072 GO:0019932 GO:0019934 GO:0019935 GO:0022613 GO:0023052 GO:0030529 GO:0030684 GO:0031974 GO:0031981 GO:0032040 GO:0032991 GO:0034470 GO:…	map03008	FBgn0033454
wingless	wg	1e-46	188	006032	0.684994	0.650077	0.465418	0.212639	0.000179175	0.00231338	Wingless-type MMTV integration site family, member 1	GO:0000003 GO:0000122 GO:0000165 GO:0000187 GO:0000267 GO:0000578 GO:0000768 GO:0000902 GO:0000904 GO:0000975 GO:0000988 GO:0000989 GO:0001067 GO:0001071 GO:0001501 GO:0001558 GO:0001568 GO:0001654 GO:0001655 GO:0001656 GO:0001657 GO:0001658 GO:0001664 GO:0001667 GO:0001702 GO:0001708 GO:0001709 GO:0001736 GO:0001738 GO:0001756 GO:0001763 GO:0001775 GO:0001817 GO:0001819 GO:0001822 GO:0001823 GO:…	map04310 map04340 map04916 map05166 map05200 map05217	FBgn0004009
Rho1	Rho1	2e-103	374	014903	3.33358	3.51077	3.08694	2.95368	0.000268859	0.00325423	RhoA protein	GO:0000166 GO:0003674 GO:0003824 GO:0003924 GO:0005488 GO:0005525 GO:0005575 GO:0005622 GO:0005623 GO:0005737 GO:0005886 GO:0006139 GO:0006163 GO:0006184 GO:0006195 GO:0006753 GO:0006807 GO:0006996 GO:0007010 GO:0007154 GO:0007165 GO:0007264 GO:0007275 GO:0008150 GO:0008152 GO:0009056 GO:0009117 GO:0009141 GO:0009143 GO:0009144 GO:0009146 GO:0009150 GO:0009154 GO:0009166 GO:0009199 GO:0009203 GO:…		FBgn0034073
Van Gogh	Vang	3e-93	343	000933	4.08083	4.08193	3.57789	3.87259	0.00126116	0.0114416	Van gogh	GO:0000003 GO:0000132 GO:0000226 GO:0000278 GO:0000902 GO:0000904 GO:0001525 GO:0001568 GO:0001569 GO:0001654 GO:0001655 GO:0001667 GO:0001736 GO:0001738 GO:0001745 GO:0001756 GO:0001763 GO:0001764 GO:0001822 GO:0001837 GO:0001838 GO:0001839 GO:0001840 GO:0001841 GO:0001843 GO:0001942 GO:0001944 GO:0001947 GO:0002009 GO:0002011 GO:0003002 GO:0003006 GO:0003007 GO:0003143 GO:0003148 GO:0003149 GO:…	map04310	FBgn0015838
shaggy	sgg	2e-36	154	005923	6.57089	6.33779	5.89844	6.26629	0.00161819	0.0141058	Cdk2	GO:0000087 GO:0000166 GO:0000278 GO:0000279 GO:0000280 GO:0000307 GO:0000781 GO:0000793 GO:0000803 GO:0000805 GO:0000806 GO:0003674 GO:0003824 GO:0004672 GO:0004674 GO:0004693 GO:0005488 GO:0005515 GO:0005524 GO:0005575 GO:0005622 GO:0005623 GO:0005634 GO:0005654 GO:0005667 GO:0005694 GO:0005737 GO:0005768 GO:0005815 GO:0005856 GO:0006139 GO:0006259 GO:0006281 GO:0006355 GO:0006464 GO:0006468 GO:…
Calcium/calmodulin-dependent protein kinase II	CaMKII	0	793	002231	7.50489	7.83408	7.94386	7.9	0.00238703	0.0193882	Calcium/calmodulin-dependent protein kinase (CaM kinase) II delta 2	GO:0000082 GO:0000166 GO:0000278 GO:0002376 GO:0003008 GO:0003012 GO:0003013 GO:0003015 GO:0003674 GO:0003824 GO:0004672 GO:0004674 GO:0004683 GO:0005488 GO:0005515 GO:0005516 GO:0005524 GO:0005575 GO:0005622 GO:0005623 GO:0005634 GO:0005654 GO:0005737 GO:0005783 GO:0005789 GO:0005829 GO:0005886 GO:0005954 GO:0006464 GO:0006468 GO:0006793 GO:0006796 GO:0006810 GO:0006811 GO:0006812 GO:0006816 GO:…	map04012 map04020 map04114 map04310 map04720 map04722 map04725 map04728 map04740 map04745 map04912 map04916 map04971 map05031 map05152 map05214
shaggy	sgg	1e-34	148	006827	2.85107	3.06025	3.34286	3.1657	0.00408038	0.0299816	Cell division protein kinase 5 homolog	GO:0000166 GO:0000307 GO:0000902 GO:0000904 GO:0001764 GO:0001932 GO:0001963 GO:0002039 GO:0003008 GO:0003674 GO:0003824 GO:0004672 GO:0004674 GO:0004693 GO:0005102 GO:0005176 GO:0005488 GO:0005515 GO:0005524 GO:0005575 GO:0005622 GO:0005623 GO:0005634 GO:0005737 GO:0005829 GO:0005856 GO:0005886 GO:0006325 GO:0006355 GO:0006464 GO:0006468 GO:0006793 GO:0006796 GO:0006810 GO:0006873 GO:0006886 GO:…	map04360 map05010 map05030
cAMP-dependent protein kinase 3	Pka-C3	2e-38	161	002788	0.567596	0.789532	1.36151	0.805597	0.00545569	0.0378826	Putative cAMP-dependent protein kinase type 3	GO:0000166 GO:0003674 GO:0003824 GO:0004672 GO:0004674 GO:0004690 GO:0004691 GO:0005488 GO:0005524 GO:0005575 GO:0005622 GO:0005623 GO:0005634 GO:0005737 GO:0005886 GO:0006464 GO:0006468 GO:0006793 GO:0006796 GO:0008150 GO:0008152 GO:0009987 GO:0016020 GO:0016301 GO:0016310 GO:0016740 GO:0016772 GO:0016773 GO:0017076 GO:0019538 GO:0030554 GO:0032553 GO:0032555 GO:0032559 GO:0035639 GO:0043170 GO:…
cAMP-dependent protein kinase 3	Pka-C3	2e-42	174	008268	8.59185	8.74574	8.26442	8.25366	0.00561172	0.0386969	3-phosphoinositide-dependent protein kinase 1	GO:0000166 GO:0001932 GO:0002682 GO:0002684 GO:0002694 GO:0003008 GO:0003674 GO:0003824 GO:0004672 GO:0004674 GO:0004676 GO:0005102 GO:0005158 GO:0005488 GO:0005515 GO:0005524 GO:0005543 GO:0005575 GO:0005622 GO:0005623 GO:0005634 GO:0005737 GO:0005829 GO:0005886 GO:0005912 GO:0005924 GO:0005925 GO:0006139 GO:0006351 GO:0006355 GO:0006464 GO:0006468 GO:0006469 GO:0006793 GO:0006796 GO:0006807 GO:…	map03320 map04150 map04510 map04910 map04960 map05213 map05215 map05223	FBgn0020386
widerborst	wdb	8e-24	112	010550	1.89361	1.95513	2.18119	2.39419	0.0102676	0.0634285	Serine/threonine-protein phosphatase 2A 56 kDa regulatory subunit epsilon isoform (Fragment)	GO:0000159 GO:0003674 GO:0005488 GO:0005575 GO:0005622 GO:0005623 GO:0007154 GO:0007165 GO:0008150 GO:0008287 GO:0008601 GO:0009987 GO:0019208 GO:0019222 GO:0019888 GO:0023052 GO:0030234 GO:0032991 GO:0043226 GO:0043227 GO:0043229 GO:0043231 GO:0043234 GO:0044424 GO:0044464 GO:0050789 GO:0050790 GO:0050794 GO:0050896 GO:0051716 GO:0065007 GO:0065009
Smad on X	Smox	2e-95	348	000028	4.80255	4.6388	4.45575	4.55827	0.0431827	0.20505	Protein mothers against dpp	GO:0000003 GO:0000122 GO:0000165 GO:0000578 GO:0000975 GO:0000976 GO:0000977 GO:0000979 GO:0000987 GO:0000988 GO:0001012 GO:0001046 GO:0001047 GO:0001067 GO:0001071 GO:0001085 GO:0001102 GO:0001159 GO:0001501 GO:0001503 GO:0001558 GO:0001649 GO:0001654 GO:0001655 GO:0001657 GO:0001666 GO:0001701 GO:0001704 GO:0001707 GO:0001710 GO:0001756 GO:0001775 GO:0001817 GO:0001819 GO:0001822 GO:0001836 GO:…	map04350	FBgn0011648
no receptor potential A	norpA	1e-32	143	009727	1.88973	1.73866	2.35518	2.00444	0.0515641	0.237016	Phospholipase c beta	GO:0000267 GO:0003008 GO:0003674 GO:0003824 GO:0004435 GO:0004620 GO:0004629 GO:0004871 GO:0005488 GO:0005509 GO:0005515 GO:0005543 GO:0005575 GO:0005622 GO:0005623 GO:0005626 GO:0005634 GO:0005737 GO:0005829 GO:0006629 GO:0007154 GO:0007165 GO:0008081 GO:0008150 GO:0008152 GO:0008289 GO:0009056 GO:0009987 GO:0016042 GO:0016298 GO:0016787 GO:0016788 GO:0019899 GO:0023052 GO:0032501 GO:0032879 GO:…	map00562 map04020 map04062 map04070 map04270 map04310 map04540 map04720 map04723 map04724 map04725 map04726 map04728 map04730 map04745 map04912 map04916 map04961 map04970 map04971 map04972 map05010 map05016 map05142 map05143 map05146
espinas	esn	1e-44	182	011378	3.57441	3.3997	3.38323	3.27025	0.0858636	0.362393	Testin	GO:0003674 GO:0005488 GO:0008270 GO:0043167 GO:0043169 GO:0046872 GO:0046914		FBgn0034223
Casein kinase Ialpha	CkIalpha	3e-31	136	014721	4.48715	4.68065	4.87955	4.7558	0.090801	0.379769	Casein kinase I isoform alpha	GO:0000087 GO:0000166 GO:0000278 GO:0000279 GO:0000280 GO:0000775 GO:0000776 GO:0000777 GO:0000779 GO:0000793 GO:0000902 GO:0003674 GO:0003824 GO:0004672 GO:0004674 GO:0005488 GO:0005524 GO:0005575 GO:0005622 GO:0005623 GO:0005634 GO:0005654 GO:0005694 GO:0005737 GO:0005815 GO:0005847 GO:0005849 GO:0005856 GO:0006464 GO:0006468 GO:0006793 GO:0006796 GO:0006996 GO:0007049 GO:0007067 GO:0007154 GO:…
Casein kinase II beta subunit	CkIIbeta	5e-32	137	001252	6.34709	6.30949	6.29874	6.11168	0.0974697	0.402709	Casein kinase II subunit beta	GO:0003674 GO:0003824 GO:0005102 GO:0005488 GO:0005515 GO:0005575 GO:0005622 GO:0005623 GO:0005634 GO:0005737 GO:0005886 GO:0005956 GO:0006464 GO:0006468 GO:0006793 GO:0006796 GO:0007154 GO:0007165 GO:0007166 GO:0007275 GO:0008134 GO:0008150 GO:0008152 GO:0009987 GO:0010033 GO:0016020 GO:0016055 GO:0016301 GO:0016310 GO:0016740 GO:0016772 GO:0019207 GO:0019220 GO:0019221 GO:0019222 GO:0019538 GO:…	map03008 map04064 map04310 map04520 map04530 map04712 map05162 map05168 map05169	FBgn0026136;FBgn0000259
armadillo	arm	1e-99	365	004177	6.10314	6.10544	6.03931	5.95436	0.134617	0.529414	Putative catenin beta 1 (Fragment)	GO:0000003 GO:0000122 GO:0000267 GO:0000578 GO:0000902 GO:0000904 GO:0000975 GO:0000988 GO:0000989 GO:0001067 GO:0001525 GO:0001568 GO:0001569 GO:0001570 GO:0001654 GO:0001655 GO:0001656 GO:0001657 GO:0001658 GO:0001702 GO:0001704 GO:0001706 GO:0001708 GO:0001709 GO:0001711 GO:0001759 GO:0001763 GO:0001822 GO:0001838 GO:0001885 GO:0001944 GO:0002009 GO:0002064 GO:0002682 GO:0002761 GO:0002762 GO:…	map04310 map04510 map04520 map04530 map04670 map04916 map05100 map05130 map05166 map05200 map05210 map05213 map05215 map05216 map05217 map05412	FBgn0000117
cAMP-dependent protein kinase 1	Pka-C1	0	500	001964	0.380345	0.340644	0.227432	0.212865	0.227911	0.820076	Putative cAMP-dependent protein kinase catalytic subunit	GO:0000166 GO:0000267 GO:0000287 GO:0001704 GO:0001707 GO:0003674 GO:0003824 GO:0004672 GO:0004674 GO:0004690 GO:0004691 GO:0005488 GO:0005515 GO:0005524 GO:0005575 GO:0005622 GO:0005623 GO:0005624 GO:0005626 GO:0005634 GO:0005737 GO:0005739 GO:0005813 GO:0005815 GO:0005829 GO:0005856 GO:0005886 GO:0005952 GO:0006464 GO:0006468 GO:0006793 GO:0006796 GO:0007275 GO:0007369 GO:0007498 GO:0008150 GO:…	map04010 map04020 map04062 map04113 map04114 map04210 map04270 map04310 map04340 map04540 map04720 map04723 map04724 map04725 map04726 map04727 map04728 map04740 map04742 map04910 map04912 map04914 map04916 map04961 map04962 map04970 map04971 map04976 map05020 map05030 map05031 map05032 map05110 map05146 map05166 map05169 map05414
Calcium/calmodulin-dependent protein kinase II	CaMKII	6e-37	155	003116	4.50142	4.64484	4.69426	4.85337	0.259884	0.916135	Serine/threonine-protein kinase PLK4	GO:0000003 GO:0000166 GO:0000226 GO:0000278 GO:0000279 GO:0001578 GO:0003006 GO:0003674 GO:0003824 GO:0004672 GO:0004674 GO:0004713 GO:0005488 GO:0005524 GO:0005575 GO:0005622 GO:0005623 GO:0005737 GO:0005813 GO:0005814 GO:0005815 GO:0005856 GO:0006464 GO:0006468 GO:0006793 GO:0006796 GO:0006996 GO:0007010 GO:0007017 GO:0007049 GO:0007051 GO:0007052 GO:0007098 GO:0007099 GO:0007276 GO:0007281 GO:…
APC-like	Apc	2e-166	391	000317	2.27197	1.63406	1.81062	1.87724	1	1	Hypothetical protein	GO:0003674 GO:0005488 GO:0005515 GO:0007154 GO:0007165 GO:0007166 GO:0008013 GO:0008150 GO:0009987 GO:0016055 GO:0023052 GO:0050789 GO:0050794 GO:0050896 GO:0051716 GO:0065007	map04310 map04810 map05166 map05200 map05210 map05213 map05217	FBgn0015589
armadillo	arm	4e-22	105	003294	6.28709	6.09288	6.21824	5.93153	1	1	39S ribosomal protein L16, mitochondrial	GO:0003674 GO:0003676 GO:0003723 GO:0003735 GO:0005198 GO:0005488 GO:0005575 GO:0005622 GO:0005623 GO:0005737 GO:0005739 GO:0005840 GO:0006412 GO:0008150 GO:0008152 GO:0009058 GO:0009059 GO:0009987 GO:0010467 GO:0019538 GO:0019843 GO:0030529 GO:0032991 GO:0034645 GO:0043170 GO:0043226 GO:0043227 GO:0043228 GO:0043229 GO:0043231 GO:0043232 GO:0044237 GO:0044238 GO:0044249 GO:0044260 GO:0044267 GO:…		FBgn0023519
arrow	arr	2e-42	176	005560	4.37006	5.02351	4.3	4.63106	1	1	Sortilin-related receptor	GO:0003674 GO:0004872 GO:0005575 GO:0005623 GO:0016020 GO:0016021 GO:0031224 GO:0044425 GO:0044464
arrow	arr	1e-65	252	005577	0.980429	0.240549	0.59379	0.472578	1	1	Low density lipoprotein receptor-related protein 2	GO:0000267 GO:0003674 GO:0004872 GO:0005488 GO:0005515 GO:0005575 GO:0005622 GO:0005623 GO:0005624 GO:0005626 GO:0005737 GO:0005768 GO:0005783 GO:0005794 GO:0005886 GO:0005903 GO:0005905 GO:0006766 GO:0006810 GO:0006897 GO:0006898 GO:0007275 GO:0007399 GO:0007417 GO:0007420 GO:0008150 GO:0008152 GO:0008283 GO:0009987 GO:0010324 GO:0012505 GO:0016020 GO:0016021 GO:0016023 GO:0016043 GO:0016044 GO:…
arrow	arr	3e-94	325	007798	3.81876	2.26215	2.76386	2.58277	1	1	Lipoprotein receptor-related protein 6	GO:0003674 GO:0004872 GO:0005575 GO:0005623 GO:0016020 GO:0016021 GO:0031224 GO:0044425 GO:0044464	map04340
basket	bsk	4e-24	102	006190	6.32038	6.47573	6.53717	6.26334	1	1	Integral membrane protein GPR175, putative	GO:0000166 GO:0003674 GO:0003824 GO:0004672 GO:0004674 GO:0004871 GO:0004872 GO:0004888 GO:0004930 GO:0005488 GO:0005524 GO:0005575 GO:0005623 GO:0006464 GO:0006468 GO:0006629 GO:0006793 GO:0006796 GO:0007154 GO:0007165 GO:0007166 GO:0007186 GO:0007568 GO:0008150 GO:0008152 GO:0009987 GO:0016020 GO:0016021 GO:0016301 GO:0016310 GO:0016740 GO:0016772 GO:0016773 GO:0017076 GO:0019538 GO:0023052 GO:…
basket	bsk	4e-24	102	006192	2.90567	3.657	3.54408	3.65474	1	1	Serine/threonine-protein kinase prp4	GO:0000166 GO:0000375 GO:0000377 GO:0000398 GO:0003674 GO:0003824 GO:0004672 GO:0004674 GO:0005488 GO:0005524 GO:0005575 GO:0006139 GO:0006396 GO:0006397 GO:0006464 GO:0006468 GO:0006793 GO:0006796 GO:0006807 GO:0008150 GO:0008152 GO:0008380 GO:0009987 GO:0010467 GO:0010564 GO:0010948 GO:0016070 GO:0016071 GO:0016301 GO:0016310 GO:0016740 GO:0016772 GO:0016773 GO:0017076 GO:0019538 GO:0030554 GO:…
Calcineurin A at 14F	CanA-14F	0	868	014389	2.02813	1.23086	1.27758	1.43414	1	1	Serine/threonine-protein phosphatase (Fragment)	GO:0003674 GO:0003824 GO:0004721 GO:0006793 GO:0006796 GO:0008150 GO:0008152 GO:0009987 GO:0016311 GO:0016787 GO:0016788 GO:0016791 GO:0042578 GO:0044237	map04010 map04020 map04114 map04210 map04310 map04360 map04370 map04380 map04650 map04660 map04662 map04720 map04724 map04728 map05010 map05014 map05031 map05152 map05166	FBgn0010015;FBgn0011826
Calcineurin B	CanB	4e-25	114	000472	8.8908	9.30459	9.06592	9.38233	1	1	Calcineurin B homologous protein 2	GO:0003674 GO:0005488 GO:0005509 GO:0005575 GO:0005622 GO:0005623 GO:0005737 GO:0043167 GO:0043169 GO:0044424 GO:0044464 GO:0046872	map04010 map04020 map04114 map04210 map04310 map04360 map04370 map04380 map04650 map04660 map04662 map04720 map04724 map05010 map05014 map05031 map05152 map05166	FBgn0010014;FBgn0015614
Calcium/calmodulin-dependent protein kinase II	CaMKII	8e-58	225	000423	0.435799	0.296818	0.392302	0.620623	1	1
Calcium/calmodulin-dependent protein kinase II	CaMKII	8e-58	225	000424	7.03648	6.97631	7.11601	6.98325	1	1	Calcium/calmodulin-dependent protein kinase type 1D	GO:0000166 GO:0002682 GO:0002684 GO:0002685 GO:0002687 GO:0002688 GO:0002690 GO:0003674 GO:0003824 GO:0004672 GO:0004674 GO:0004683 GO:0005488 GO:0005515 GO:0005516 GO:0005524 GO:0005575 GO:0005622 GO:0005623 GO:0005634 GO:0005737 GO:0005954 GO:0006355 GO:0006464 GO:0006468 GO:0006793 GO:0006796 GO:0006950 GO:0006952 GO:0006954 GO:0007275 GO:0007399 GO:0008150 GO:0008152 GO:0009611 GO:0009889 GO:…
Calcium/calmodulin-dependent protein kinase II	CaMKII	2e-26	121	013877	5.28058	5.24104	5.28133	5.24105	1	1	P21 protein (Cdc42/Rac)-activated kinase 3	GO:0000165 GO:0000166 GO:0000187 GO:0000267 GO:0000902 GO:0000904 GO:0001666 GO:0001932 GO:0001934 GO:0002253 GO:0002376 GO:0002429 GO:0002682 GO:0002684 GO:0002694 GO:0002696 GO:0002757 GO:0002764 GO:0002768 GO:0003674 GO:0003824 GO:0004672 GO:0004674 GO:0004708 GO:0004712 GO:0005488 GO:0005515 GO:0005524 GO:0005575 GO:0005622 GO:0005623 GO:0005624 GO:0005626 GO:0005634 GO:0005635 GO:0005737 GO:…
cAMP-dependent protein kinase 1	Pka-C1	6e-114	410	005372	0	0	0	0.0151696	1	1	Putative cAMP-dependent protein kinase catalytic subunit	GO:0000166 GO:0000267 GO:0000287 GO:0001704 GO:0001707 GO:0003674 GO:0003824 GO:0004672 GO:0004674 GO:0004690 GO:0004691 GO:0005488 GO:0005515 GO:0005524 GO:0005575 GO:0005622 GO:0005623 GO:0005624 GO:0005626 GO:0005634 GO:0005737 GO:0005739 GO:0005813 GO:0005815 GO:0005829 GO:0005856 GO:0005886 GO:0005952 GO:0006464 GO:0006468 GO:0006793 GO:0006796 GO:0007154 GO:0007165 GO:0007166 GO:0007275 GO:…
cAMP-dependent protein kinase 1	Pka-C1	3e-108	392	012125	0.0476515	0.0200797	0.0339291	0.0479175	1	1
cAMP-dependent protein kinase 1	Pka-C1	3e-108	392	012126	0.108386	0	0.182284	0	1	1	Putative cAMP-dependent protein kinase catalytic subunit	GO:0000166 GO:0000267 GO:0000287 GO:0001704 GO:0001707 GO:0003674 GO:0003824 GO:0004672 GO:0004674 GO:0004690 GO:0004691 GO:0005488 GO:0005515 GO:0005524 GO:0005575 GO:0005622 GO:0005623 GO:0005624 GO:0005626 GO:0005634 GO:0005737 GO:0005739 GO:0005813 GO:0005815 GO:0005829 GO:0005856 GO:0005886 GO:0005952 GO:0006464 GO:0006468 GO:0006793 GO:0006796 GO:0007154 GO:0007165 GO:0007166 GO:0007275 GO:…
cAMP-dependent protein kinase 1	Pka-C1	5e-95	348	012127	0.0749016	0	0.0894179	0	1	1	Putative cAMP-dependent protein kinase catalytic subunit	GO:0000166 GO:0000267 GO:0000287 GO:0001704 GO:0001707 GO:0003674 GO:0003824 GO:0004672 GO:0004674 GO:0004690 GO:0004691 GO:0005488 GO:0005515 GO:0005524 GO:0005575 GO:0005622 GO:0005623 GO:0005624 GO:0005625 GO:0005626 GO:0005634 GO:0005737 GO:0005739 GO:0005813 GO:0005815 GO:0005829 GO:0005856 GO:0005886 GO:0005952 GO:0006464 GO:0006468 GO:0006793 GO:0006796 GO:0007154 GO:0007165 GO:0007166 GO:…
cAMP-dependent protein kinase 1	Pka-C1	1e-87	323	012128	2.70914	3.58428	3.52412	3.33311	1	1	Potassium channel subfamily K member 2 isoform 2	GO:0003008 GO:0003674 GO:0005215 GO:0005216 GO:0005242 GO:0005244 GO:0005249 GO:0005261 GO:0005267 GO:0005575 GO:0005622 GO:0005623 GO:0005737 GO:0005768 GO:0005886 GO:0005887 GO:0005903 GO:0006810 GO:0006811 GO:0006812 GO:0006813 GO:0006873 GO:0007154 GO:0007165 GO:0007166 GO:0007186 GO:0007267 GO:0007268 GO:0008076 GO:0008150 GO:0008324 GO:0009987 GO:0010033 GO:0014070 GO:0015075 GO:0015077 GO:…
cAMP-dependent protein kinase 3	Pka-C3	4e-24	113	006288	0.449525	0.24595	0.362973	0.174767	1	1	Ribosomal protein S6 kinase beta-2	GO:0000166 GO:0000287 GO:0003674 GO:0003824 GO:0004672 GO:0004674 GO:0005488 GO:0005524 GO:0006464 GO:0006468 GO:0006793 GO:0006796 GO:0007154 GO:0007165 GO:0007243 GO:0008150 GO:0008152 GO:0009987 GO:0016301 GO:0016310 GO:0016740 GO:0016772 GO:0016773 GO:0017076 GO:0019538 GO:0023052 GO:0030554 GO:0032553 GO:0032555 GO:0032559 GO:0035556 GO:0035639 GO:0043167 GO:0043169 GO:0043170 GO:0043412 GO:…	map04010 map04114 map04150 map04720 map04722 map04914	FBgn0262866
cAMP-dependent protein kinase 3	Pka-C3	6e-21	103	010221	0.0289152	0.243523	0.285828	0.21905	1	1	Testis-specific serine/threonine-protein kinase 6	GO:0000003 GO:0000166 GO:0000287 GO:0001669 GO:0003006 GO:0003674 GO:0003824 GO:0004672 GO:0004674 GO:0005488 GO:0005515 GO:0005524 GO:0005575 GO:0005622 GO:0005623 GO:0005737 GO:0005813 GO:0005814 GO:0005815 GO:0005856 GO:0006139 GO:0006259 GO:0006323 GO:0006325 GO:0006355 GO:0006464 GO:0006468 GO:0006793 GO:0006796 GO:0006807 GO:0006996 GO:0006997 GO:0007275 GO:0007276 GO:0007281 GO:0007283 GO:…
cAMP-dependent protein kinase 3	Pka-C3	6e-21	103	010222	1.96437	2.9031	2.89594	2.78041	1	1	Testis-specific serine/threonine-protein kinase 6	GO:0000003 GO:0000166 GO:0000287 GO:0003006 GO:0003674 GO:0003824 GO:0004672 GO:0004674 GO:0005488 GO:0005524 GO:0005575 GO:0005622 GO:0005623 GO:0006464 GO:0006468 GO:0006793 GO:0006796 GO:0007275 GO:0007276 GO:0007281 GO:0007283 GO:0007286 GO:0008150 GO:0008152 GO:0009987 GO:0016301 GO:0016310 GO:0016740 GO:0016772 GO:0016773 GO:0017076 GO:0019538 GO:0019953 GO:0022414 GO:0030154 GO:0030554 GO:…
cAMP-dependent protein kinase 3	Pka-C3	8e-44	179	011117	2.74524	2.63681	2.63175	2.51649	0.761191	1	Glutamate receptor 4, putative	GO:0000087 GO:0000166 GO:0000226 GO:0000278 GO:0000279 GO:0000280 GO:0000775 GO:0000793 GO:0000922 GO:0003674 GO:0003824 GO:0004672 GO:0004674 GO:0004871 GO:0004872 GO:0004888 GO:0004970 GO:0005215 GO:0005216 GO:0005230 GO:0005231 GO:0005234 GO:0005488 GO:0005515 GO:0005524 GO:0005575 GO:0005622 GO:0005623 GO:0005634 GO:0005694 GO:0005737 GO:0005813 GO:0005815 GO:0005819 GO:0005856 GO:0005874 GO:…
Casein kinase Ialpha	CkIalpha	3e-31	136	014722	3.30144	1.83296	1.4633	2.35584	1	1	CSNK1A1 protein	GO:0000087 GO:0000166 GO:0000278 GO:0000279 GO:0000280 GO:0000775 GO:0000776 GO:0000777 GO:0000779 GO:0000793 GO:0000902 GO:0003674 GO:0003824 GO:0004672 GO:0004674 GO:0005488 GO:0005515 GO:0005524 GO:0005575 GO:0005622 GO:0005623 GO:0005634 GO:0005654 GO:0005694 GO:0005737 GO:0005815 GO:0005847 GO:0005849 GO:0005856 GO:0006464 GO:0006468 GO:0006793 GO:0006796 GO:0006996 GO:0007049 GO:0007067 GO:…	map04310 map04340
casein kinase IIalpha	CkIIalpha	1e-97	157	005622	5.14603	5.35801	5.16558	5.2929	1	1	Casein kinase subunit II	GO:0000075 GO:0000166 GO:0003674 GO:0003824 GO:0004672 GO:0004674 GO:0005488 GO:0005515 GO:0005524 GO:0005575 GO:0005622 GO:0005623 GO:0005634 GO:0005737 GO:0006139 GO:0006351 GO:0006355 GO:0006464 GO:0006468 GO:0006793 GO:0006796 GO:0006807 GO:0006915 GO:0007049 GO:0007093 GO:0007154 GO:0007165 GO:0007166 GO:0007275 GO:0007346 GO:0008150 GO:0008152 GO:0008219 GO:0009058 GO:0009059 GO:0009889 GO:…	map03008 map04064 map04310 map04520 map04530 map04712 map05162 map05168 map05169	FBgn0264492
C-terminal Binding Protein	CtBP	4e-42	172	008045	2.37723	1.11877	1.44821	1.91505	1	1	C-terminal Binding Protein	GO:0000166 GO:0003674 GO:0003824 GO:0005488 GO:0005515 GO:0005575 GO:0005622 GO:0005623 GO:0005634 GO:0005654 GO:0006139 GO:0006351 GO:0006355 GO:0006807 GO:0008150 GO:0008152 GO:0009058 GO:0009059 GO:0009889 GO:0009890 GO:0009892 GO:0009987 GO:0010467 GO:0010468 GO:0010556 GO:0010558 GO:0010605 GO:0010629 GO:0016070 GO:0016491 GO:0016614 GO:0016616 GO:0017053 GO:0019219 GO:0019222 GO:0030154 GO:…	map04310 map04330 map05200 map05220	FBgn0020496
discs overgrown	dco	2e-27	124	009497	1.33806	2.17748	1.63063	2.17147	1	1	Csnk1a1	GO:0000087 GO:0000166 GO:0000278 GO:0000279 GO:0000280 GO:0000775 GO:0000776 GO:0000777 GO:0000779 GO:0000793 GO:0000902 GO:0003674 GO:0003824 GO:0004672 GO:0004674 GO:0005488 GO:0005515 GO:0005524 GO:0005575 GO:0005622 GO:0005623 GO:0005634 GO:0005654 GO:0005694 GO:0005737 GO:0005815 GO:0005847 GO:0005849 GO:0005856 GO:0006464 GO:0006468 GO:0006793 GO:0006796 GO:0006996 GO:0007049 GO:0007067 GO:…	map04310 map04340 map04710 map04711
Dishevelled Associated Activator of Morphogenesis	DAAM	3e-27	125	005494	0.0791596	0	0.0500707	0.0500897	1	1	Dishevelled associated activator of morphogenesis 1	GO:0003674 GO:0003779 GO:0005488 GO:0005515 GO:0006996 GO:0007010 GO:0008092 GO:0008150 GO:0009987 GO:0016043 GO:0017016 GO:0017048 GO:0019899 GO:0030029 GO:0030036 GO:0031267 GO:0051020 GO:0071840 GO:0071841 GO:0071842	map04310
ebi	ebi	7e-106	294	000165	5.81022	5.37126	5.43869	5.4477	1	1	Transducin (beta)-like 1 X-linked receptor 1	GO:0000118 GO:0000122 GO:0000975 GO:0000988 GO:0000989 GO:0001067 GO:0003008 GO:0003674 GO:0003676 GO:0003677 GO:0003682 GO:0003712 GO:0003714 GO:0003824 GO:0004872 GO:0005488 GO:0005515 GO:0005575 GO:0005622 GO:0005623 GO:0005634 GO:0005654 GO:0005667 GO:0005819 GO:0005856 GO:0005874 GO:0005876 GO:0006139 GO:0006325 GO:0006351 GO:0006355 GO:0006357 GO:0006508 GO:0006511 GO:0006629 GO:0006807 GO:…	map04310	FBgn0263933
ethanol sensitive with low memory	elm	5e-37	154	008549	4.80455	5.23073	4.7661	4.9576	1	1	Calcineurin B	GO:0003674 GO:0003824 GO:0004721 GO:0004722 GO:0005488 GO:0005509 GO:0005515 GO:0005575 GO:0005622 GO:0005623 GO:0005737 GO:0005829 GO:0006464 GO:0006470 GO:0006793 GO:0006796 GO:0006810 GO:0008150 GO:0008152 GO:0009987 GO:0016043 GO:0016311 GO:0016787 GO:0016788 GO:0016791 GO:0019538 GO:0032501 GO:0042578 GO:0043167 GO:0043169 GO:0043170 GO:0043412 GO:0044237 GO:0044238 GO:0044260 GO:0044267 GO:…	map04010 map04020 map04114 map04210 map04310 map04360 map04370 map04380 map04650 map04660 map04662 map04720 map04724 map05010 map05014 map05031 map05152 map05166	FBgn0037358
frizzled	fz	7e-112	405	011563	0.81086	0.308406	0.469725	0.536241	1	1	Frizzled homolog 2 (Drosophila)	GO:0000003 GO:0000139 GO:0000267 GO:0000902 GO:0000904 GO:0001503 GO:0001525 GO:0001553 GO:0001568 GO:0001570 GO:0001649 GO:0001654 GO:0001701 GO:0001736 GO:0001738 GO:0001775 GO:0001838 GO:0001841 GO:0001843 GO:0001890 GO:0001892 GO:0001932 GO:0001934 GO:0001942 GO:0001944 GO:0002009 GO:0002376 GO:0002520 GO:0002521 GO:0003001 GO:0003006 GO:0003007 GO:0003008 GO:0003149 GO:0003150 GO:0003151 GO:…	map04310 map04916 map05166 map05200 map05217	FBgn0001085
frizzled 4	fz4	9e-74	278	004758	1.08101	0.935515	0.993082	1.06872	1	1	Frizzled-4	GO:0000003 GO:0000902 GO:0000904 GO:0001553 GO:0001568 GO:0001570 GO:0001654 GO:0001944 GO:0003001 GO:0003006 GO:0003008 GO:0003674 GO:0004871 GO:0004872 GO:0004888 GO:0004930 GO:0005488 GO:0005515 GO:0005575 GO:0005622 GO:0005623 GO:0005737 GO:0005886 GO:0005887 GO:0005911 GO:0006355 GO:0006357 GO:0006810 GO:0006869 GO:0007154 GO:0007155 GO:0007162 GO:0007165 GO:0007166 GO:0007186 GO:0007223 GO:…	map04310 map04916 map05166 map05200 map05217	FBgn0027342
groucho	gro	2e-31	120	003517	2.64174	1.55342	1.88938	1.62605	1	1	Groucho protein	GO:0005575 GO:0005622 GO:0005623 GO:0005634 GO:0006355 GO:0008150 GO:0009889 GO:0010468 GO:0010556 GO:0019219 GO:0019222 GO:0031323 GO:0031326 GO:0043226 GO:0043227 GO:0043229 GO:0043231 GO:0044424 GO:0044464 GO:0050789 GO:0050794 GO:0051171 GO:0051252 GO:0060255 GO:0065007 GO:0080090 GO:2000112
lin-19-like	lin19	1e-57	225	002152	4.14617	4.95349	4.8788	4.92043	1	1	Cullin-5	GO:0000003 GO:0000082 GO:0000151 GO:0000209 GO:0000267 GO:0000278 GO:0001653 GO:0001709 GO:0003002 GO:0003006 GO:0003008 GO:0003674 GO:0003824 GO:0004842 GO:0004871 GO:0004872 GO:0004888 GO:0004930 GO:0005000 GO:0005215 GO:0005216 GO:0005261 GO:0005262 GO:0005488 GO:0005515 GO:0005575 GO:0005622 GO:0005623 GO:0005624 GO:0005626 GO:0005634 GO:0005737 GO:0005829 GO:0006464 GO:0006468 GO:0006508 GO:…	map04120	FBgn0039632
lin-19-like	lin19	1e-20	102	012133	0.785213	0.364077	0.571534	0.52705	1	1	Cullin 3	GO:0000087 GO:0000090 GO:0000151 GO:0000278 GO:0000279 GO:0000280 GO:0000902 GO:0000904 GO:0000910 GO:0000922 GO:0003674 GO:0005488 GO:0005515 GO:0005575 GO:0005622 GO:0005623 GO:0005634 GO:0005737 GO:0005819 GO:0005827 GO:0005856 GO:0005874 GO:0005876 GO:0006464 GO:0006508 GO:0006511 GO:0006513 GO:0006810 GO:0006888 GO:0006900 GO:0006901 GO:0006903 GO:0006928 GO:0006996 GO:0007010 GO:0007015 GO:…	map03420 map04120
Medea	Med	1e-35	152	014520	2.15582	1.96128	1.94938	2.1845	1	1	Hypothetical protein	GO:0001071 GO:0003674 GO:0003700 GO:0005575 GO:0005622 GO:0005623 GO:0005634 GO:0005654 GO:0005667 GO:0006139 GO:0006351 GO:0006355 GO:0006807 GO:0007154 GO:0007165 GO:0007166 GO:0007167 GO:0007178 GO:0007179 GO:0008150 GO:0008152 GO:0009058 GO:0009059 GO:0009889 GO:0009987 GO:0010467 GO:0010468 GO:0010556 GO:0016070 GO:0019219 GO:0019222 GO:0023052 GO:0031323 GO:0031326 GO:0031974 GO:0031981 GO:…	map04110 map04310 map04350 map04520 map05166 map05200 map05210 map05212 map05220	FBgn0011655
microtubule star	mts	2e-20	100	005549	1.24492	0.947758	0.976137	1.30135	1	1	Protein phosphatase 1, catalytic subunit, alpha isoform (Fragment)	GO:0003674 GO:0003824 GO:0004721 GO:0006793 GO:0006796 GO:0008150 GO:0008152 GO:0009987 GO:0016311 GO:0016787 GO:0016788 GO:0016791 GO:0042578 GO:0044237
microtubule star	mts	2e-55	216	011054	0.780395	1.14095	0.828356	0.767243	1	1	Ser/Thr protein phosphatase homologous to PP2A	GO:0003674 GO:0003824 GO:0004721 GO:0006793 GO:0006796 GO:0008150 GO:0008152 GO:0009987 GO:0016311 GO:0016787 GO:0016788 GO:0016791 GO:0042578 GO:0044237
microtubule star	mts	4e-32	139	011055	3.54561	3.11566	3.92276	2.875	1	1	Serine/threonine-protein phosphatase	GO:0003674 GO:0003824 GO:0004721 GO:0006793 GO:0006796 GO:0008150 GO:0008152 GO:0009987 GO:0016311 GO:0016787 GO:0016788 GO:0016791 GO:0042578 GO:0044237
nejire	nej	2e-75	286	016171	3.17715	2.06865	2.11868	2.23842	1	1			map04110 map04310 map04330 map04350 map04520 map04630 map04720 map04916 map05016 map05152 map05164 map05166 map05168 map05169 map05200 map05211 map05215
nemo	nmo	2e-20	100	000324	0.511775	0.759975	0.622208	0.671469	1	1	Cdk1	GO:0000003 GO:0000075 GO:0000077 GO:0000082 GO:0000086 GO:0000087 GO:0000166 GO:0000278 GO:0000279 GO:0000280 GO:0000302 GO:0003674 GO:0003824 GO:0004672 GO:0004674 GO:0004693 GO:0005488 GO:0005515 GO:0005524 GO:0005575 GO:0005622 GO:0005623 GO:0005634 GO:0005654 GO:0005737 GO:0005739 GO:0005819 GO:0005856 GO:0005874 GO:0005876 GO:0006139 GO:0006259 GO:0006275 GO:0006323 GO:0006325 GO:0006461 GO:…	map04110 map04114 map04115 map04914 map05162 map05168 map05169 map05200 map05215 map05222
nemo	nmo	7e-25	115	005675	0.0913088	0.0105629	0.0757323	0.100375	1	1	Nemo-like kinase 2	GO:0000165 GO:0000166 GO:0000287 GO:0001704 GO:0003002 GO:0003674 GO:0003824 GO:0004672 GO:0004674 GO:0004702 GO:0004707 GO:0004871 GO:0005057 GO:0005488 GO:0005515 GO:0005524 GO:0005575 GO:0005622 GO:0005623 GO:0005634 GO:0005737 GO:0006139 GO:0006351 GO:0006355 GO:0006464 GO:0006468 GO:0006793 GO:0006796 GO:0006807 GO:0007154 GO:0007165 GO:0007166 GO:0007167 GO:0007178 GO:0007179 GO:0007243 GO:…
nemo	nmo	2e-24	114	005676	4.7588	5.09477	4.31317	5.03753	1	1	Nemo-like kinase 2	GO:0000165 GO:0000166 GO:0000287 GO:0001704 GO:0003002 GO:0003674 GO:0003824 GO:0004672 GO:0004674 GO:0004702 GO:0004707 GO:0004871 GO:0005057 GO:0005488 GO:0005515 GO:0005524 GO:0005575 GO:0005622 GO:0005623 GO:0005634 GO:0005737 GO:0006139 GO:0006351 GO:0006355 GO:0006464 GO:0006468 GO:0006793 GO:0006796 GO:0006807 GO:0007154 GO:0007165 GO:0007166 GO:0007167 GO:0007178 GO:0007179 GO:0007243 GO:…
nemo	nmo	3e-21	103	009299	1.81079	2.30266	2.18537	2.24122	1	1	Cdk9	GO:0000166 GO:0000975 GO:0001067 GO:0003674 GO:0003676 GO:0003677 GO:0003723 GO:0003824 GO:0004672 GO:0004674 GO:0004693 GO:0005488 GO:0005515 GO:0005524 GO:0005575 GO:0005622 GO:0005623 GO:0005634 GO:0005654 GO:0005737 GO:0006139 GO:0006259 GO:0006260 GO:0006261 GO:0006275 GO:0006281 GO:0006282 GO:0006351 GO:0006354 GO:0006355 GO:0006366 GO:0006368 GO:0006464 GO:0006468 GO:0006793 GO:0006796 GO:…	map05202
no receptor potential A	norpA	7e-26	120	002271	2.83654	2.72422	2.99306	2.83392	1	1	1-phosphatidylinositol-4,5-bisphosphate phosphodiesterase gamma-1	GO:0001525 GO:0001568 GO:0001570 GO:0001701 GO:0001726 GO:0001944 GO:0002253 GO:0002376 GO:0002429 GO:0002520 GO:0002682 GO:0002684 GO:0002757 GO:0002764 GO:0002768 GO:0003674 GO:0003824 GO:0004435 GO:0004620 GO:0004629 GO:0004871 GO:0005102 GO:0005488 GO:0005509 GO:0005515 GO:0005543 GO:0005575 GO:0005622 GO:0005623 GO:0005737 GO:0005829 GO:0005886 GO:0006629 GO:0006644 GO:0006810 GO:0006811 GO:…	map00562 map04012 map04020 map04064 map04070 map04370 map04650 map04660 map04664 map04666 map04670 map04722 map05110 map05120 map05169 map05200 map05214 map05223
Phospholipase C at 21C	Plc21C	5e-43	177	010471	3.27476	3.12283	3.22134	3.21797	1	1	Plcb1	GO:0003674 GO:0003824 GO:0004435 GO:0004620 GO:0004629 GO:0004871 GO:0005488 GO:0005509 GO:0005575 GO:0005622 GO:0005623 GO:0006629 GO:0007154 GO:0007165 GO:0008081 GO:0008150 GO:0008152 GO:0009056 GO:0009987 GO:0016042 GO:0016298 GO:0016787 GO:0016788 GO:0023052 GO:0035556 GO:0042578 GO:0043167 GO:0043169 GO:0044238 GO:0044464 GO:0046872 GO:0050789 GO:0050794 GO:0050896 GO:0051716 GO:0060089 GO:…	map00562 map04020 map04062 map04070 map04270 map04310 map04540 map04720 map04723 map04724 map04725 map04726 map04728 map04730 map04745 map04912 map04916 map04961 map04970 map04971 map04972 map05010 map05016 map05142 map05143 map05146
pontin	pont	4e-58	150	008204	4.66244	4.34482	5.12111	4.03591	1	1	Putative ruvb-like 1 DNA helicase	GO:0000166 GO:0000228 GO:0000785 GO:0000790 GO:0000988 GO:0000989 GO:0003674 GO:0003678 GO:0003712 GO:0003824 GO:0004386 GO:0005488 GO:0005524 GO:0005575 GO:0005622 GO:0005623 GO:0005634 GO:0005694 GO:0006139 GO:0006259 GO:0006281 GO:0006325 GO:0006338 GO:0006351 GO:0006355 GO:0006364 GO:0006396 GO:0006807 GO:0006950 GO:0006974 GO:0006996 GO:0008150 GO:0008152 GO:0009058 GO:0009059 GO:0009889 GO:…	map04310	FBgn0040078
porcupine	por	7e-36	152	006493	4.29817	4.11751	4.46619	4.14676	1	1	Atg5	GO:0003674 GO:0003824 GO:0005488 GO:0005515 GO:0005575 GO:0005622 GO:0005623 GO:0005737 GO:0005783 GO:0005789 GO:0006914 GO:0007154 GO:0007165 GO:0007166 GO:0007275 GO:0008150 GO:0008152 GO:0009056 GO:0009100 GO:0009888 GO:0009987 GO:0012505 GO:0016020 GO:0016021 GO:0016055 GO:0016740 GO:0016746 GO:0023052 GO:0030176 GO:0031090 GO:0031224 GO:0031227 GO:0031300 GO:0031301 GO:0032501 GO:0032502 GO:…	map04310	FBgn0004957
PP2A-B'	PP2A-B'	2e-30	134	006299	1.90028	1.80178	1.77463	1.89805	1	1	Phosphatase 2A regulatory subunit B family B56 beta isoform	GO:0000159 GO:0003674 GO:0005488 GO:0005575 GO:0005622 GO:0005623 GO:0007154 GO:0007165 GO:0008150 GO:0008287 GO:0008601 GO:0009987 GO:0019208 GO:0019222 GO:0019888 GO:0023052 GO:0030234 GO:0032991 GO:0043226 GO:0043227 GO:0043229 GO:0043231 GO:0043234 GO:0044424 GO:0044464 GO:0050789 GO:0050790 GO:0050794 GO:0050896 GO:0051716 GO:0065007 GO:0065009	map03015 map04113 map04114 map04310 map04728
prickle	pk	4e-62	241	001633	1.5852	1.75739	1.97393	1.56477	1	1	Putative LIM domain only protein	GO:0003674 GO:0005488 GO:0008270 GO:0043167 GO:0043169 GO:0046872 GO:0046914	map04310	FBgn0263934;FBgn0003090
Protein C kinase 53E	Pkc53E	2e-84	314	001739	6.25206	5.97721	6.16809	6.04452	1	1	Potassium channel tetramerisation domain containing 5	GO:0003674 GO:0005215 GO:0005216 GO:0005575 GO:0006461 GO:0006810 GO:0006811 GO:0008150 GO:0009987 GO:0015075 GO:0015267 GO:0016043 GO:0022607 GO:0022803 GO:0022838 GO:0022857 GO:0022891 GO:0022892 GO:0034220 GO:0043933 GO:0044085 GO:0051179 GO:0051234 GO:0051259 GO:0051260 GO:0055085 GO:0065003 GO:0070271 GO:0071822 GO:0071840		FBgn0025394
Protein C kinase 53E	Pkc53E	2e-84	314	001740	0.782041	1.17014	0.841513	1.01369	1	1	Serine/threonine-protein kinase N2 (Fragment)	GO:0000166 GO:0003674 GO:0003824 GO:0004672 GO:0004674 GO:0004697 GO:0005488 GO:0005524 GO:0005575 GO:0005622 GO:0005623 GO:0006464 GO:0006468 GO:0006793 GO:0006796 GO:0007154 GO:0007165 GO:0008150 GO:0008152 GO:0009987 GO:0016301 GO:0016310 GO:0016740 GO:0016772 GO:0016773 GO:0017076 GO:0019538 GO:0023052 GO:0030554 GO:0032553 GO:0032555 GO:0032559 GO:0035639 GO:0043170 GO:0043412 GO:0044237 GO:…	map05132	FBgn0020621
Protein C kinase 53E	Pkc53E	3e-74	239	008644	5.27442	6.1389	5.90854	5.85196	1	1	Protein kinase C	GO:0000166 GO:0000267 GO:0001775 GO:0002376 GO:0002682 GO:0002684 GO:0003008 GO:0003674 GO:0003824 GO:0004672 GO:0004674 GO:0004697 GO:0005488 GO:0005515 GO:0005524 GO:0005575 GO:0005622 GO:0005623 GO:0005624 GO:0005626 GO:0005634 GO:0005737 GO:0005739 GO:0005829 GO:0005886 GO:0006139 GO:0006325 GO:0006355 GO:0006464 GO:0006468 GO:0006793 GO:0006796 GO:0006807 GO:0006915 GO:0006950 GO:0006996 GO:…	map04010 map04011 map04012 map04020 map04070 map04270 map04310 map04370 map04510 map04530 map04540 map04650 map04666 map04670 map04720 map04723 map04724 map04725 map04726 map04727 map04728 map04730 map04745 map04916 map04960 map04961 map04970 map04971 map04972 map05031 map05032 map05110 map05143 map05146 map05200 map05214 map05223	FBgn0004784;FBgn0003091
Protein C kinase 53E	Pkc53E	8e-24	112	009848	2.51316	2.79145	2.45329	2.34409	0.817289	1	Hypothetical protein
Protein C kinase 53E	Pkc53E	9e-23	109	010872	2.09808	1.40773	1.08687	1.56597	1	1	Protein kinase C, epsilon (Fragment)	GO:0000166 GO:0001775 GO:0001816 GO:0001932 GO:0002250 GO:0002252 GO:0002376 GO:0002443 GO:0002449 GO:0002460 GO:0003674 GO:0003824 GO:0004672 GO:0004674 GO:0004697 GO:0005488 GO:0005515 GO:0005524 GO:0005575 GO:0005622 GO:0005623 GO:0005634 GO:0005737 GO:0005783 GO:0005829 GO:0005886 GO:0005911 GO:0006464 GO:0006468 GO:0006793 GO:0006796 GO:0006915 GO:0006950 GO:0006955 GO:0007154 GO:0007165 GO:…	map04270 map04530
Protein phosphatase 2A at 29B	Pp2A-29B	1e-25	103	012440	0.130813	0.0756823	0.0936584	0.12352	1	1	Hypothetical protein
Rac1	Rac1	6e-29	127	004832	2.58807	3.03622	2.95916	2.92835	1	1	Ras-related C3 botulinum toxin substrate 1	GO:0000166 GO:0000267 GO:0003674 GO:0003824 GO:0003924 GO:0005488 GO:0005525 GO:0005575 GO:0005622 GO:0005623 GO:0005624 GO:0005626 GO:0005737 GO:0006139 GO:0006163 GO:0006184 GO:0006195 GO:0006753 GO:0006807 GO:0006935 GO:0006996 GO:0007010 GO:0007154 GO:0007165 GO:0007264 GO:0007275 GO:0007399 GO:0008150 GO:0008152 GO:0009056 GO:0009117 GO:0009141 GO:0009143 GO:0009144 GO:0009146 GO:0009150 GO:…
Rac1	Rac1	2e-21	102	009876	7.05299	6.90001	7.15892	6.94777	1	1	Cdc42 homolog precursor	GO:0000166 GO:0001932 GO:0003674 GO:0003824 GO:0003924 GO:0005488 GO:0005515 GO:0005525 GO:0005575 GO:0005622 GO:0005623 GO:0005737 GO:0005815 GO:0005819 GO:0005856 GO:0005886 GO:0005912 GO:0006139 GO:0006163 GO:0006184 GO:0006195 GO:0006753 GO:0006807 GO:0006810 GO:0006996 GO:0007010 GO:0007015 GO:0007154 GO:0007163 GO:0007165 GO:0007166 GO:0007264 GO:0007267 GO:0007275 GO:0007346 GO:0007399 GO:…	map04010 map04011 map04062 map04144 map04360 map04370 map04510 map04520 map04530 map04660 map04666 map04670 map04722 map04810 map04912 map05100 map05120 map05130 map05131 map05132 map05200 map05211 map05212
Rac1	Rac1	4e-29	127	011379	4.26299	4.51139	4.52259	4.41609	1	1	Ras-related C3 botulinum toxin substrate 1	GO:0000166 GO:0000267 GO:0000902 GO:0000904 GO:0001894 GO:0002064 GO:0002093 GO:0003008 GO:0003382 GO:0003674 GO:0003824 GO:0003924 GO:0005488 GO:0005515 GO:0005525 GO:0005575 GO:0005622 GO:0005623 GO:0005624 GO:0005626 GO:0005634 GO:0005635 GO:0005737 GO:0005829 GO:0005856 GO:0005884 GO:0005886 GO:0006139 GO:0006163 GO:0006184 GO:0006195 GO:0006753 GO:0006807 GO:0006810 GO:0006897 GO:0006909 GO:…	map04010 map04062 map04145 map04310 map04360 map04370 map04380 map04510 map04520 map04620 map04650 map04662 map04664 map04666 map04670 map04722 map04810 map04972 map05014 map05100 map05120 map05131 map05132 map05200 map05210 map05211 map05212 map05416
Rho1	Rho1	2e-103	374	014904	9.28341	9.26573	9.25071	9.22301	1	1	RhoA protein	GO:0000166 GO:0003674 GO:0003824 GO:0003924 GO:0005488 GO:0005525 GO:0005575 GO:0005622 GO:0005623 GO:0005737 GO:0005886 GO:0006139 GO:0006163 GO:0006184 GO:0006195 GO:0006753 GO:0006807 GO:0006996 GO:0007010 GO:0007154 GO:0007165 GO:0007264 GO:0007275 GO:0008150 GO:0008152 GO:0009056 GO:0009117 GO:0009141 GO:0009143 GO:0009144 GO:0009146 GO:0009150 GO:0009154 GO:0009166 GO:0009199 GO:0009203 GO:…	map04062 map04144 map04270 map04310 map04350 map04360 map04510 map04520 map04530 map04660 map04670 map04722 map04810 map04972 map05100 map05130 map05133 map05152 map05200 map05210
Rho-kinase	rok	0	675	007552	2.11386	1.53584	2.09006	1.71811	1	1	Rho-associated, coiled-coil containing protein kinase 1	GO:0000166 GO:0003674 GO:0003824 GO:0004672 GO:0004674 GO:0005488 GO:0005524 GO:0005575 GO:0005622 GO:0005623 GO:0006464 GO:0006468 GO:0006793 GO:0006796 GO:0007154 GO:0007165 GO:0008150 GO:0008152 GO:0009987 GO:0016301 GO:0016310 GO:0016740 GO:0016772 GO:0016773 GO:0017076 GO:0019538 GO:0023052 GO:0030554 GO:0032553 GO:0032555 GO:0032559 GO:0035639 GO:0043170 GO:0043412 GO:0044237 GO:0044238 GO:…	map04062 map04270 map04310 map04350 map04360 map04510 map04670 map04810 map05130 map05131 map05132
shaggy	sgg	8e-37	156	012494	0.802108	1.07482	1.15436	1.05273	1	1	Glycogen synthase kinase-3 beta isoform 2	GO:0000166 GO:0001932 GO:0001934 GO:0003674 GO:0003824 GO:0004672 GO:0004674 GO:0005488 GO:0005515 GO:0005524 GO:0005575 GO:0005622 GO:0005623 GO:0005737 GO:0006464 GO:0006468 GO:0006793 GO:0006796 GO:0006928 GO:0007154 GO:0007165 GO:0007166 GO:0007275 GO:0008150 GO:0008152 GO:0009653 GO:0009887 GO:0009889 GO:0009893 GO:0009966 GO:0009968 GO:0009987 GO:0010556 GO:0010562 GO:0010604 GO:0010646 GO:…
shaggy	sgg	6e-27	123	012496	3.10957	3.72705	2.98428	3.88802	1	1	Glycogen synthase kinase-3 beta isoform 2	GO:0000166 GO:0001932 GO:0001934 GO:0003674 GO:0003824 GO:0004672 GO:0004674 GO:0005488 GO:0005515 GO:0005524 GO:0005575 GO:0005622 GO:0005623 GO:0005737 GO:0006464 GO:0006468 GO:0006793 GO:0006796 GO:0006928 GO:0007154 GO:0007165 GO:0007166 GO:0007275 GO:0008150 GO:0008152 GO:0009653 GO:0009887 GO:0009889 GO:0009893 GO:0009966 GO:0009968 GO:0009987 GO:0010556 GO:0010562 GO:0010604 GO:0010646 GO:…	map04012 map04062 map04110 map04310 map04340 map04360 map04510 map04660 map04662 map04711 map04722 map04728 map04910 map04916 map05010 map05160 map05162 map05164 map05166 map05169 map05200 map05210 map05213 map05215 map05217
skpA	skpA	5e-76	283	003242	8.57726	8.87786	8.87567	8.88746	1	1	Cytochrome b-561 domain containing 2	GO:0003674 GO:0005488 GO:0005575 GO:0005623 GO:0006091 GO:0006810 GO:0008150 GO:0008152 GO:0009987 GO:0016020 GO:0016021 GO:0022900 GO:0031224 GO:0043167 GO:0043169 GO:0044237 GO:0044425 GO:0044464 GO:0046872 GO:0051179 GO:0051234 GO:0055114	map04110 map04111 map04114 map04120 map04141 map04310 map04350 map04710 map05168	FBgn0026174;FBgn0034863;FBgn0025637;FBgn0026176;FBgn0031074
Smad on X	Smox	2e-22	106	015511	3.91086	4.14364	4.0333	4.09015	1	1	TGF-beta signal transducer Smad2 (Fragment)	GO:0003674 GO:0003824 GO:0003964 GO:0004518 GO:0004519 GO:0005575 GO:0005622 GO:0005623 GO:0006355 GO:0008150 GO:0008152 GO:0009889 GO:0010468 GO:0010556 GO:0016740 GO:0016772 GO:0016779 GO:0016787 GO:0016788 GO:0019219 GO:0019222 GO:0031323 GO:0031326 GO:0034061 GO:0044464 GO:0050789 GO:0050794 GO:0051171 GO:0051252 GO:0060255 GO:0065007 GO:0080090 GO:2000112
supernumerary limbs	slmb	1e-25	118	007311	0.832732	0.966117	0.914853	1.32117	1	1	F-box/WD repeat-containing protein 1A	GO:0000151 GO:0000209 GO:0001763 GO:0002009 GO:0003674 GO:0003824 GO:0004842 GO:0005488 GO:0005515 GO:0005575 GO:0005622 GO:0005623 GO:0006355 GO:0006464 GO:0006470 GO:0006508 GO:0006511 GO:0006793 GO:0006796 GO:0007275 GO:0008013 GO:0008150 GO:0008152 GO:0008283 GO:0009056 GO:0009057 GO:0009653 GO:0009888 GO:0009889 GO:0009890 GO:0009891 GO:0009892 GO:0009893 GO:0009894 GO:0009966 GO:0009987 GO:…
TGF-beta activated kinase 1	Tak1	4e-22	107	015691	0.552694	0.413019	0.390066	0.366435	0.412251	1	M3K7	GO:0000166 GO:0003674 GO:0003824 GO:0004672 GO:0004674 GO:0005488 GO:0005524 GO:0006464 GO:0006468 GO:0006793 GO:0006796 GO:0008150 GO:0008152 GO:0009987 GO:0016301 GO:0016310 GO:0016740 GO:0016772 GO:0016773 GO:0017076 GO:0019538 GO:0030554 GO:0032553 GO:0032555 GO:0032559 GO:0035639 GO:0043170 GO:0043412 GO:0044237 GO:0044238 GO:0044260 GO:0044267	map04010 map04064 map04310 map04380 map04520 map04620 map04621 map04622 map04660 map05140 map05145 map05162 map05168 map05169	FBgn0026323
widerborst	wdb	2e-45	184	010551	5.23831	5.20502	4.96074	5.26717	1	1	Serine/threonine-protein phosphatase 2A 56 kDa regulatory subunit epsilon isoform (Fragment)	GO:0000159 GO:0003674 GO:0005488 GO:0005575 GO:0005622 GO:0005623 GO:0007154 GO:0007165 GO:0008150 GO:0008287 GO:0008601 GO:0009987 GO:0019208 GO:0019222 GO:0019888 GO:0023052 GO:0030234 GO:0032991 GO:0043226 GO:0043227 GO:0043229 GO:0043231 GO:0043234 GO:0044424 GO:0044464 GO:0050789 GO:0050790 GO:0050794 GO:0050896 GO:0051716 GO:0065007 GO:0065009	map03015 map04113 map04114 map04310 map04728
Wnt oncogene analog 10	Wnt10	8e-24	112	011209	0.034482	0.0155294	0.043265	0	1	1	Wnt-1	GO:0000975 GO:0001067 GO:0001889 GO:0003674 GO:0003676 GO:0003677 GO:0005102 GO:0005488 GO:0005515 GO:0005575 GO:0005576 GO:0005578 GO:0005622 GO:0005623 GO:0005737 GO:0006355 GO:0006950 GO:0006974 GO:0007154 GO:0007162 GO:0007165 GO:0007166 GO:0007275 GO:0008150 GO:0008284 GO:0008593 GO:0009611 GO:0009653 GO:0009719 GO:0009725 GO:0009790 GO:0009887 GO:0009889 GO:0009891 GO:0009893 GO:0009966 GO:…
Wnt oncogene analog 5	Wnt5	1e-20	102	013415	1.02087	1.23258	1.84996	1.16974	1	1	Wingless-type MMTV integration site family member 5b	GO:0000902 GO:0000904 GO:0001568 GO:0001664 GO:0001701 GO:0001759 GO:0001837 GO:0001890 GO:0001892 GO:0001944 GO:0002053 GO:0003002 GO:0003007 GO:0003156 GO:0003205 GO:0003206 GO:0003209 GO:0003228 GO:0003230 GO:0003674 GO:0005102 GO:0005109 GO:0005110 GO:0005125 GO:0005488 GO:0005515 GO:0005575 GO:0005576 GO:0005578 GO:0005615 GO:0005622 GO:0005623 GO:0005737 GO:0005886 GO:0006355 GO:0006357 GO:…
Wnt oncogene analog 6	Wnt6	2e-33	144	006034	0.0497865	0.0207448	0.0776588	0.0535507	0.462959	1	Wingless-type MMTV integration site family, member 6 precursor	GO:0000902 GO:0000904 GO:0001568 GO:0001664 GO:0001701 GO:0001759 GO:0001837 GO:0001890 GO:0001892 GO:0001944 GO:0002053 GO:0003002 GO:0003007 GO:0003156 GO:0003205 GO:0003206 GO:0003209 GO:0003228 GO:0003230 GO:0003674 GO:0005102 GO:0005109 GO:0005110 GO:0005125 GO:0005488 GO:0005515 GO:0005575 GO:0005576 GO:0005578 GO:0005615 GO:0005622 GO:0005623 GO:0005737 GO:0005886 GO:0006355 GO:0006357 GO:…
Wnt oncogene analog 6	Wnt6	2e-33	144	006036	1.61426	1.54943	1.61733	1.39946	1	1	Wingless-type MMTV integration site family, member 6 precursor	GO:0000902 GO:0000904 GO:0001568 GO:0001664 GO:0001701 GO:0001759 GO:0001837 GO:0001890 GO:0001892 GO:0001944 GO:0002053 GO:0003002 GO:0003007 GO:0003156 GO:0003205 GO:0003206 GO:0003209 GO:0003228 GO:0003230 GO:0003674 GO:0005102 GO:0005109 GO:0005110 GO:0005125 GO:0005488 GO:0005515 GO:0005575 GO:0005576 GO:0005578 GO:0005615 GO:0005622 GO:0005623 GO:0005737 GO:0005886 GO:0006355 GO:0006357 GO:…	map04310 map04340 map04916 map05166 map05200 map05217	FBgn0031902
Notch signalling pathway
					Avarage log2 expression				permutation test
NAME	SYMBOL	e-value	bitscore	GeneID: MCINX_	Åland	Uppland	Saaremaa	Öland	P value	FDR	description	GO term	KEGG entry	Dmel_FlybaseID
Notch	N	5e-31	134	001133	2.69213	2.5905	2.91432	3.39013	0	0	Cadherin-related tumor suppressor	GO:0003674 GO:0005488 GO:0005509 GO:0005575 GO:0005623 GO:0005886 GO:0007155 GO:0007156 GO:0008150 GO:0009987 GO:0016020 GO:0016021 GO:0016337 GO:0022610 GO:0031224 GO:0043167 GO:0043169 GO:0044425 GO:0044464 GO:0046872 GO:0071944		FBgn0001075
Notch	N	2e-58	225	002722	2.97316	3.0353	3.74929	3.48452	0	0	Delta/notch-like EGF repeat containing b	GO:0003674 GO:0005488 GO:0005509 GO:0043167 GO:0043169 GO:0046872		FBgn0051665
fringe	fng	7e-87	317	010114	5.34187	5.52055	4.97707	5.0246	0	0	MFNG O-fucosylpeptide 3-beta-N-acetylglucosaminyltransferase	GO:0000003 GO:0000139 GO:0000279 GO:0001541 GO:0003002 GO:0003006 GO:0003674 GO:0003824 GO:0005488 GO:0005575 GO:0005576 GO:0005615 GO:0005622 GO:0005623 GO:0005737 GO:0005794 GO:0007049 GO:0007126 GO:0007143 GO:0007154 GO:0007165 GO:0007166 GO:0007219 GO:0007275 GO:0007386 GO:0007389 GO:0007399 GO:0007548 GO:0008150 GO:0008152 GO:0008194 GO:0008375 GO:0008406 GO:0008585 GO:0008593 GO:0009653 GO:…	map00514 map04330	FBgn0011591
groucho	gro	9e-56	214	012093	4.86167	3.45172	3.44697	2.54532	0	0			map04310 map04330
-	CG6843	2e-60	229	005274	3.08133	3.39317	3.82792	3.46629	0.00126078	0.0114416	CG6843		map04330	FBgn0036827
Pcaf	Pcaf	4e-66	249	001209	0.560776	0.645981	1.16229	0.647241	0.00205411	0.0171265	Histone acetyltransferase KAT2A	GO:0000123 GO:0001701 GO:0001756 GO:0001838 GO:0001841 GO:0001843 GO:0002009 GO:0003002 GO:0003674 GO:0003682 GO:0003824 GO:0004402 GO:0004468 GO:0005488 GO:0005515 GO:0005575 GO:0005622 GO:0005623 GO:0005634 GO:0005654 GO:0006325 GO:0006355 GO:0006464 GO:0006473 GO:0006475 GO:0006996 GO:0007275 GO:0007389 GO:0007399 GO:0007417 GO:0007420 GO:0008080 GO:0008150 GO:0008152 GO:0008283 GO:0009653 GO:…	map04330 map05166	FBgn0020388
Rpd3	Rpd3	6e-51	198	011553	1.25609	1.38502	2.06409	1.42551	0.00259803	0.020828	Putative histone deacetylase 1 (Fragment)	GO:0003674 GO:0003824 GO:0004407 GO:0005575 GO:0005622 GO:0005623 GO:0005634 GO:0005737 GO:0006139 GO:0006325 GO:0006351 GO:0006355 GO:0006464 GO:0006476 GO:0006807 GO:0006996 GO:0008150 GO:0008152 GO:0009058 GO:0009059 GO:0009889 GO:0009987 GO:0010467 GO:0010468 GO:0010556 GO:0016043 GO:0016070 GO:0016568 GO:0016569 GO:0016570 GO:0016575 GO:0016787 GO:0016810 GO:0016811 GO:0017136 GO:0019213 GO:…	map05034
Notch	N	2e-27	122	010823	5.40473	5.48744	4.98415	4.78594	0.00384765	0.0286589	BG:DS00180.14	GO:0005575 GO:0005623 GO:0005886 GO:0006810 GO:0006897 GO:0006909 GO:0008150 GO:0009987 GO:0010324 GO:0016020 GO:0016043 GO:0016044 GO:0016192 GO:0044464 GO:0051179 GO:0051234 GO:0061024 GO:0071840 GO:0071944
nicastrin	nct	9e-66	248	013215	4.8601	5.1702	4.83385	4.4908	0.00558748	0.0385617	Nicastrin (Fragment)	GO:0000902 GO:0000904 GO:0001654 GO:0001745 GO:0001751 GO:0001754 GO:0005575 GO:0005623 GO:0006508 GO:0006509 GO:0006996 GO:0007010 GO:0007154 GO:0007165 GO:0007166 GO:0007219 GO:0007220 GO:0007267 GO:0007275 GO:0007399 GO:0007423 GO:0008150 GO:0008152 GO:0008594 GO:0009653 GO:0009887 GO:0009987 GO:0010467 GO:0016020 GO:0016021 GO:0016043 GO:0016485 GO:0019538 GO:0022008 GO:0022603 GO:0023052 GO:…	map04330 map05010	FBgn0039234
Notch	N	1e-25	117	005508	3.46231	3.40659	2.88792	3.14318	0.15884	0.605809	EGF-containing fibulin-like extracellular matrix protein 1 (Fragment)	GO:0003674 GO:0003824 GO:0004672 GO:0004713 GO:0004714 GO:0004871 GO:0004872 GO:0004888 GO:0005006 GO:0005102 GO:0005154 GO:0005488 GO:0005509 GO:0005515 GO:0005575 GO:0005576 GO:0005615 GO:0006355 GO:0006464 GO:0006468 GO:0006793 GO:0006796 GO:0007154 GO:0007165 GO:0007166 GO:0007167 GO:0007169 GO:0007173 GO:0008150 GO:0008152 GO:0009889 GO:0009987 GO:0010468 GO:0010556 GO:0016301 GO:0016310 GO:…
Delta	Dl	1e-169	593	000464	0.184049	0.293842	0.246493	0.29412	1	1	Delta-like 3 (Drosophila)	GO:0001501 GO:0001525 GO:0001568 GO:0001655 GO:0001701 GO:0001709 GO:0001756 GO:0001757 GO:0001822 GO:0001944 GO:0002040 GO:0002376 GO:0002520 GO:0002682 GO:0003002 GO:0003008 GO:0003013 GO:0003674 GO:0005102 GO:0005112 GO:0005488 GO:0005509 GO:0005515 GO:0005575 GO:0005576 GO:0005622 GO:0005623 GO:0005737 GO:0005886 GO:0005887 GO:0007154 GO:0007165 GO:0007166 GO:0007219 GO:0007220 GO:0007267 GO:…	map04330
Notch	N	5e-44	177	001580	0.185003	0.102759	0.0845892	0.153326	1	1
numb	numb	5e-39	158	001956	1.12836	0.834396	0.946847	0.966567	1	1	Numb	GO:0000902 GO:0000904 GO:0003674 GO:0005488 GO:0005515 GO:0005575 GO:0005622 GO:0005623 GO:0005634 GO:0005737 GO:0005768 GO:0005769 GO:0005886 GO:0007275 GO:0007399 GO:0007405 GO:0007409 GO:0007417 GO:0007420 GO:0008013 GO:0008150 GO:0008283 GO:0008593 GO:0009653 GO:0009888 GO:0009966 GO:0009968 GO:0009987 GO:0010646 GO:0010648 GO:0010720 GO:0010769 GO:0010975 GO:0016020 GO:0016043 GO:0016323 GO:…	map04330	FBgn0002973
Suppressor of Hairless	Su(H)	0	702	002989	3.83109	4.21811	4.38497	4.18339	1	1	Recombining binding protein suppressor of hairless	GO:0000902 GO:0000904 GO:0000975 GO:0000976 GO:0000977 GO:0000978 GO:0000979 GO:0000981 GO:0000982 GO:0000987 GO:0001012 GO:0001046 GO:0001047 GO:0001067 GO:0001071 GO:0001077 GO:0001159 GO:0001525 GO:0001568 GO:0001708 GO:0001775 GO:0001816 GO:0001837 GO:0001942 GO:0001944 GO:0002193 GO:0002376 GO:0002437 GO:0002520 GO:0002521 GO:0003674 GO:0003676 GO:0003677 GO:0003682 GO:0003700 GO:0005488 GO:…	map04330 map05169	FBgn0004837
groucho	gro	6e-33	122	003517	2.64174	1.55342	1.88938	1.62605	1	1	Groucho protein	GO:0005575 GO:0005622 GO:0005623 GO:0005634 GO:0006355 GO:0008150 GO:0009889 GO:0010468 GO:0010556 GO:0019219 GO:0019222 GO:0031323 GO:0031326 GO:0043226 GO:0043227 GO:0043229 GO:0043231 GO:0044424 GO:0044464 GO:0050789 GO:0050794 GO:0051171 GO:0051252 GO:0060255 GO:0065007 GO:0080090 GO:2000112
groucho	gro	2e-31	134	003518	3.78778	3.42922	4.20061	3.751	1	1	Groucho protein	GO:0005575 GO:0005622 GO:0005623 GO:0005634 GO:0006355 GO:0008150 GO:0009889 GO:0010468 GO:0010556 GO:0019219 GO:0019222 GO:0031323 GO:0031326 GO:0043226 GO:0043227 GO:0043229 GO:0043231 GO:0044424 GO:0044464 GO:0050789 GO:0050794 GO:0051171 GO:0051252 GO:0060255 GO:0065007 GO:0080090 GO:2000112
Rpd3	Rpd3	9e-97	350	004321	1.19156	0.119289	0.828579	0.29391	1	1	Putative histone deacetylase 1 (Fragment)	GO:0000122 GO:0003674 GO:0003824 GO:0004407 GO:0005488 GO:0005515 GO:0005575 GO:0005622 GO:0005623 GO:0005634 GO:0005654 GO:0006139 GO:0006325 GO:0006351 GO:0006355 GO:0006357 GO:0006464 GO:0006476 GO:0006807 GO:0006996 GO:0008150 GO:0008152 GO:0009058 GO:0009059 GO:0009889 GO:0009890 GO:0009892 GO:0009987 GO:0010467 GO:0010468 GO:0010556 GO:0010558 GO:0010605 GO:0010629 GO:0016043 GO:0016070 GO:…	map05034	FBgn0025825
Rpd3	Rpd3	0	698	004646	0.915951	0.699337	0.705434	0.871717	1	1	Putative histone deacetylase 1	GO:0000118 GO:0000122 GO:0000785 GO:0003674 GO:0003824 GO:0004407 GO:0005488 GO:0005515 GO:0005575 GO:0005622 GO:0005623 GO:0005634 GO:0005654 GO:0005694 GO:0005737 GO:0006139 GO:0006325 GO:0006351 GO:0006355 GO:0006357 GO:0006464 GO:0006476 GO:0006807 GO:0006950 GO:0006996 GO:0008134 GO:0008150 GO:0008152 GO:0009058 GO:0009059 GO:0009889 GO:0009890 GO:0009892 GO:0009987 GO:0010467 GO:0010468 GO:…	map04110 map04330 map05016 map05034 map05169 map05200 map05202 map05220	FBgn0015805
Presenilin	Psn	8e-37	151	005084	1.98966	1.67551	1.96642	1.79902	1	1			map04310 map04330 map04722 map05010	FBgn0019947
Notch	N	8e-92	336	005167	5.51696	4.95988	5.20309	5.18729	1	1	Neurogenic locus Notch protein (Fragment)	GO:0003674 GO:0004857 GO:0004866 GO:0004867 GO:0005488 GO:0005509 GO:0008150 GO:0010466 GO:0010951 GO:0019222 GO:0030234 GO:0030414 GO:0043086 GO:0043167 GO:0043169 GO:0044092 GO:0046872 GO:0050789 GO:0050790 GO:0051336 GO:0051346 GO:0052547 GO:0052548 GO:0061134 GO:0061135 GO:0065007 GO:0065009
Tace	Tace	0	705	007696	0.800824	1.14511	1.24238	1.07738	1	1	ADAM 17-like protease	GO:0000079 GO:0000082 GO:0000278 GO:0001558 GO:0001666 GO:0001726 GO:0001817 GO:0001818 GO:0001819 GO:0001932 GO:0001934 GO:0002237 GO:0002682 GO:0002684 GO:0002685 GO:0002687 GO:0002688 GO:0002690 GO:0003674 GO:0003824 GO:0004175 GO:0004222 GO:0005102 GO:0005126 GO:0005138 GO:0005178 GO:0005488 GO:0005515 GO:0005575 GO:0005622 GO:0005623 GO:0005737 GO:0005856 GO:0005886 GO:0005887 GO:0005911 GO:…	map04330 map05010 map05120	FBgn0039734
C-terminal Binding Protein	CtBP	4e-32	135	008045	2.37723	1.11877	1.44821	1.91505	1	1	C-terminal Binding Protein	GO:0000166 GO:0003674 GO:0003824 GO:0005488 GO:0005515 GO:0005575 GO:0005622 GO:0005623 GO:0005634 GO:0005654 GO:0006139 GO:0006351 GO:0006355 GO:0006807 GO:0008150 GO:0008152 GO:0009058 GO:0009059 GO:0009889 GO:0009890 GO:0009892 GO:0009987 GO:0010467 GO:0010468 GO:0010556 GO:0010558 GO:0010605 GO:0010629 GO:0016070 GO:0016491 GO:0016614 GO:0016616 GO:0017053 GO:0019219 GO:0019222 GO:0030154 GO:…	map04310 map04330 map05200 map05220	FBgn0020496
Notch	N	0	1557	008435	0.719347	0.464434	0.317033	0.654801	1	1	Notch homolog 4 (Drosophila)	GO:0000003 GO:0000122 GO:0000139 GO:0000902 GO:0000904 GO:0000975 GO:0001047 GO:0001067 GO:0001071 GO:0001525 GO:0001568 GO:0001569 GO:0001655 GO:0001669 GO:0001701 GO:0001708 GO:0001709 GO:0001763 GO:0001816 GO:0001822 GO:0001837 GO:0001885 GO:0001886 GO:0001889 GO:0001942 GO:0001944 GO:0002009 GO:0002040 GO:0002052 GO:0002064 GO:0002065 GO:0002067 GO:0002193 GO:0002237 GO:0002376 GO:0002437 GO:…	map04320 map04330
Notch	N	0	714	008436	3.06077	3.49453	3.34748	3.30373	1	1	Notch protein (Fragment)	GO:0003674 GO:0004872 GO:0005488 GO:0005509 GO:0005575 GO:0005623 GO:0008150 GO:0009987 GO:0016020 GO:0030154 GO:0032502 GO:0043167 GO:0043169 GO:0044464 GO:0046872 GO:0048869
anterior pharynx defective 1	aph-1	2e-53	205	009065	1.61064	0.740941	0.830223	0.984942	1	1	Anterior pharynx defective 1a homolog	GO:0001655 GO:0001656 GO:0001822 GO:0003674 GO:0003824 GO:0004175 GO:0004190 GO:0005488 GO:0005515 GO:0005575 GO:0005622 GO:0005623 GO:0005737 GO:0005783 GO:0005789 GO:0005794 GO:0005886 GO:0005887 GO:0006508 GO:0006509 GO:0006516 GO:0006915 GO:0006917 GO:0007154 GO:0007165 GO:0007166 GO:0007167 GO:0007169 GO:0007219 GO:0007220 GO:0007275 GO:0008150 GO:0008152 GO:0008219 GO:0008233 GO:0008624 GO:…	map04330 map05010	FBgn0031458
Tace	Tace	9e-51	198	010783	1.26928	2.31243	2.30376	2.16114	1	1	ADAM metallopeptidase domain 17	GO:0000079 GO:0000082 GO:0000278 GO:0001558 GO:0001666 GO:0001726 GO:0001817 GO:0001818 GO:0001819 GO:0001932 GO:0001934 GO:0002237 GO:0002682 GO:0002684 GO:0002685 GO:0002687 GO:0002688 GO:0002690 GO:0003674 GO:0003824 GO:0004175 GO:0004222 GO:0005102 GO:0005126 GO:0005138 GO:0005178 GO:0005488 GO:0005515 GO:0005575 GO:0005622 GO:0005623 GO:0005737 GO:0005856 GO:0005886 GO:0005887 GO:0005911 GO:…
Delta	Dl	1e-42	171	011808	0.589646	0.77454	0.0667506	1.2381	1	1	Delta-like protein C
Notch	N	3e-22	105	012166	2.43588	1.70735	1.77887	2.40096	1	1	Fibulin 1	GO:0003674 GO:0004871 GO:0004872 GO:0004888 GO:0005488 GO:0005509 GO:0005515 GO:0005575 GO:0005576 GO:0005578 GO:0005623 GO:0006950 GO:0007154 GO:0007165 GO:0007596 GO:0007599 GO:0008150 GO:0009611 GO:0009987 GO:0016020 GO:0023052 GO:0031012 GO:0032501 GO:0038023 GO:0042060 GO:0043167 GO:0043169 GO:0044421 GO:0044464 GO:0046872 GO:0050789 GO:0050794 GO:0050817 GO:0050878 GO:0050896 GO:0051716 GO:…
Notch	N	2e-27	122	012979	4.00092	4.28048	4.23705	4.245	1	1	Odz, odd Oz/ten-m homolog 1	GO:0000902 GO:0000904 GO:0001654 GO:0001702 GO:0001745 GO:0001751 GO:0001754 GO:0003002 GO:0003674 GO:0003824 GO:0004180 GO:0005488 GO:0005515 GO:0005575 GO:0005623 GO:0005886 GO:0005887 GO:0006935 GO:0007154 GO:0007155 GO:0007165 GO:0007275 GO:0007350 GO:0007365 GO:0007366 GO:0007369 GO:0007389 GO:0007399 GO:0007409 GO:0007411 GO:0007417 GO:0007423 GO:0008045 GO:0008092 GO:0008150 GO:0008152 GO:…
dishevelled	dsh	1e-22	104	013102	0.0186307	0.0212058	0.513352	0	1	1	Dishevelled, dsh homolog 3	GO:0000226 GO:0000902 GO:0003674 GO:0004871 GO:0005488 GO:0005515 GO:0005575 GO:0005622 GO:0005623 GO:0005737 GO:0006996 GO:0007010 GO:0007017 GO:0007154 GO:0007165 GO:0007166 GO:0007275 GO:0008013 GO:0008150 GO:0009653 GO:0009987 GO:0010927 GO:0016043 GO:0016055 GO:0022607 GO:0023052 GO:0030030 GO:0030031 GO:0031023 GO:0032053 GO:0032501 GO:0032502 GO:0032989 GO:0032990 GO:0035556 GO:0042384 GO:…	map04310 map04330 map04916 map05166 map05200 map05217	FBgn0000499
Notch	N	5e-124	443	014932	1.656	1.62404	1.40013	1.65554	1	1	Fibropellin-1	GO:0003674 GO:0005488 GO:0005509 GO:0005575 GO:0005623 GO:0005886 GO:0007155 GO:0007275 GO:0007424 GO:0008150 GO:0009987 GO:0016020 GO:0016324 GO:0022610 GO:0030246 GO:0032501 GO:0032502 GO:0035152 GO:0043167 GO:0043169 GO:0044425 GO:0044459 GO:0044464 GO:0045177 GO:0046872 GO:0048731 GO:0048856 GO:0060541 GO:0065007 GO:0065008 GO:0071944
Notch	N	3e-33	142	015701	0.109573	0.148859	0.106887	0.0653762	1	1	Fibrillin 1	GO:0003674 GO:0004871 GO:0004872 GO:0004888 GO:0005488 GO:0005509 GO:0005575 GO:0005623 GO:0006950 GO:0007154 GO:0007165 GO:0007596 GO:0007599 GO:0008150 GO:0009611 GO:0009987 GO:0016020 GO:0023052 GO:0032501 GO:0038023 GO:0042060 GO:0043167 GO:0043169 GO:0044464 GO:0046872 GO:0050789 GO:0050794 GO:0050817 GO:0050878 GO:0050896 GO:0051716 GO:0060089 GO:0065007 GO:0065008
Notch	N	6e-24	111	015815	4.14804	3.13051	3.94068	3.97047	1	1	Odz, odd Oz/ten-m homolog 2 (Drosophila)	GO:0001702 GO:0003674 GO:0003824 GO:0004180 GO:0005575 GO:0005623 GO:0005886 GO:0005887 GO:0007154 GO:0007165 GO:0007275 GO:0007369 GO:0007399 GO:0008150 GO:0008152 GO:0008233 GO:0008238 GO:0009653 GO:0009790 GO:0009987 GO:0016020 GO:0016021 GO:0016787 GO:0023052 GO:0031224 GO:0031226 GO:0032501 GO:0032502 GO:0044425 GO:0044459 GO:0044464 GO:0048598 GO:0048731 GO:0048856 GO:0050789 GO:0050794 GO:…
Notch	N	6e-36	150	016073	1.02983	1.73634	1.33571	0.694179	1	1	Nidogen	GO:0003674 GO:0005488 GO:0005509 GO:0007155 GO:0007160 GO:0008150 GO:0009987 GO:0022610 GO:0031589 GO:0043167 GO:0043169 GO:0046872		FBgn0026403
nejire	nej	7e-144	509	016171	3.17715	2.06865	2.11868	2.23842	1	1			map04110 map04310 map04330 map04350 map04520 map04630 map04720 map04916 map05016 map05152 map05164 map05166 map05168 map05169 map05200 map05211 map05215
Hedgehog signalling pathway
					Avarage log2 expression				permutation test
NAME	SYMBOL	e-value	bitscore	GeneID: MCINX_	Åland	Uppland	Saaremaa	Öland	P value	FDR	Description	GO term	KEGG entry	Dmel Flybase ID
fused	fu	4e-31	133	005695	6.9801	7.34183	7.65702	7.47626	0	0
shaggy	sgg	8e-34	141	010351	2.1925	2.76061	3.84982	2.83627	0	0	Mitogen-activated protein kinase HOG1	GO:0000165 GO:0000166 GO:0003674 GO:0003824 GO:0004672 GO:0004674 GO:0004702 GO:0004707 GO:0004871 GO:0005057 GO:0005488 GO:0005524 GO:0005575 GO:0005622 GO:0005623 GO:0005634 GO:0005737 GO:0006139 GO:0006351 GO:0006355 GO:0006464 GO:0006468 GO:0006793 GO:0006796 GO:0006807 GO:0007154 GO:0007165 GO:0007243 GO:0008150 GO:0008152 GO:0009058 GO:0009059 GO:0009889 GO:0009987 GO:0010467 GO:0010468 GO:…	map04010 map04011 map04370 map04380 map04620 map04621 map04622 map04660 map04664 map04670 map04722 map04723 map04728 map04912 map04914 map05014 map05120 map05131 map05132 map05133 map05140 map05142 map05145 map05152 map05160 map05164 map05169
smoothened	smo	3e-84	310	000111	4.71922	4.92991	5.75705	5.31105	0	0	Polyadenylation factor I subunit 2	GO:0000087 GO:0000278 GO:0000279 GO:0000280 GO:0005575 GO:0005622 GO:0005623 GO:0005634 GO:0006139 GO:0006396 GO:0006397 GO:0006807 GO:0006996 GO:0007049 GO:0007059 GO:0007067 GO:0008150 GO:0008152 GO:0009987 GO:0010467 GO:0016043 GO:0016070 GO:0016071 GO:0022402 GO:0022403 GO:0034641 GO:0043170 GO:0043226 GO:0043227 GO:0043229 GO:0043231 GO:0044237 GO:0044238 GO:0044260 GO:0044424 GO:0044464 GO:…	map03015	FBgn0046222
hedgehog	hh	2e-94	342	007389	2.52307	2.53559	1.63955	1.38883	0	0	Hedgehog (Fragment)	GO:0000003 GO:0003002 GO:0003674 GO:0003824 GO:0005488 GO:0005515 GO:0005575 GO:0005576 GO:0005615 GO:0005622 GO:0005623 GO:0005634 GO:0005737 GO:0005886 GO:0006508 GO:0007154 GO:0007165 GO:0007267 GO:0007275 GO:0007276 GO:0007350 GO:0007365 GO:0007367 GO:0007389 GO:0007399 GO:0008150 GO:0008152 GO:0008233 GO:0009653 GO:0009790 GO:0009880 GO:0009889 GO:0009987 GO:0010467 GO:0016015 GO:0016020 GO:…	map04340	FBgn0004644
cubitus interruptus	ci	7e-27	118	001485	2.19209	2.70389	2.92147	3.05131	0	0	Hypothetical protein	GO:0003674 GO:0003676 GO:0005488 GO:0005575 GO:0005622 GO:0005623 GO:0008270 GO:0043167 GO:0043169 GO:0044464 GO:0046872 GO:0046914		FBgn0004859
supernumerary limbs	slmb	5e-34	142	015687	5.25255	5.33171	5.7261	5.38884	0	0	SJCHGC02524 protein		map04120
cAMP-dependent protein kinase 3	Pka-C3	2e-69	259	002031	5.66719	5.46275	5.20565	5.2952	0	0	Ribosomal protein S6 kinase beta-1	GO:0000003 GO:0000082 GO:0000166 GO:0000267 GO:0000278 GO:0001101 GO:0002237 GO:0003006 GO:0003008 GO:0003009 GO:0003012 GO:0003674 GO:0003824 GO:0004435 GO:0004620 GO:0004629 GO:0004672 GO:0004674 GO:0004711 GO:0005488 GO:0005515 GO:0005524 GO:0005575 GO:0005622 GO:0005623 GO:0005624 GO:0005625 GO:0005626 GO:0005634 GO:0005737 GO:0005739 GO:0005740 GO:0005741 GO:0005829 GO:0005840 GO:0006417 GO:…	map04012 map04150 map04350 map04666 map04910 map05221	FBgn0015806
cAMP-dependent protein kinase 3	Pka-C3	7e-49	191	007405	6.33526	6.61183	6.85768	6.69126	0	0	Serine/threonine-protein kinase 38-like	GO:0000166 GO:0000287 GO:0003674 GO:0003779 GO:0003824 GO:0004672 GO:0004674 GO:0004697 GO:0005488 GO:0005515 GO:0005524 GO:0005575 GO:0005622 GO:0005623 GO:0005634 GO:0005737 GO:0005856 GO:0006464 GO:0006468 GO:0006793 GO:0006796 GO:0007154 GO:0007165 GO:0007243 GO:0007275 GO:0007399 GO:0008092 GO:0008150 GO:0008152 GO:0009987 GO:0010975 GO:0015629 GO:0016020 GO:0016301 GO:0016310 GO:0016740 GO:…
cAMP-dependent protein kinase 3	Pka-C3	8e-51	182	013002	9.1896	9.54571	9.68891	9.82275	0	0	Protein kinase C, theta (Fragment)	GO:0000166 GO:0001772 GO:0001817 GO:0002682 GO:0002684 GO:0002694 GO:0002696 GO:0003674 GO:0003824 GO:0004672 GO:0004674 GO:0004697 GO:0005488 GO:0005524 GO:0005575 GO:0005622 GO:0005623 GO:0005737 GO:0005886 GO:0006355 GO:0006464 GO:0006468 GO:0006793 GO:0006796 GO:0007154 GO:0007165 GO:0008150 GO:0008152 GO:0008284 GO:0009889 GO:0009891 GO:0009893 GO:0009987 GO:0010468 GO:0010556 GO:0010557 GO:…	map04270 map04530	FBgn0259680
Megalin	mgl	9e-89	286	005137	1.31093	1.57115	2.23853	2.08275	8.86e-05	0.00126484	Very low-density lipoprotein receptor	GO:0000267 GO:0001948 GO:0003674 GO:0004872 GO:0005215 GO:0005488 GO:0005509 GO:0005515 GO:0005575 GO:0005576 GO:0005615 GO:0005623 GO:0005624 GO:0005626 GO:0006810 GO:0006897 GO:0006898 GO:0007275 GO:0007399 GO:0007417 GO:0008104 GO:0008150 GO:0008565 GO:0009987 GO:0010324 GO:0015031 GO:0016020 GO:0016021 GO:0016043 GO:0016044 GO:0016192 GO:0019222 GO:0021510 GO:0021517 GO:0022892 GO:0030228 GO:…		FBgn0066101;FBgn0051092
wingless	wg	1e-110	396	006032	0.684994	0.650077	0.465418	0.212639	0.000179175	0.00231338	Wingless-type MMTV integration site family, member 1	GO:0000003 GO:0000122 GO:0000165 GO:0000187 GO:0000267 GO:0000578 GO:0000768 GO:0000902 GO:0000904 GO:0000975 GO:0000988 GO:0000989 GO:0001067 GO:0001071 GO:0001501 GO:0001558 GO:0001568 GO:0001654 GO:0001655 GO:0001656 GO:0001657 GO:0001658 GO:0001664 GO:0001667 GO:0001702 GO:0001708 GO:0001709 GO:0001736 GO:0001738 GO:0001756 GO:0001763 GO:0001775 GO:0001817 GO:0001819 GO:0001822 GO:0001823 GO:…	map04310 map04340 map04916 map05166 map05200 map05217	FBgn0004009
cAMP-dependent protein kinase 3	Pka-C3	6e-23	105	000442	1.25767	1.69291	1.82193	2.23326	0.000270249	0.00325423	Microtubule-associated serine/threonine-protein kinase-like	GO:0000166 GO:0003674 GO:0003824 GO:0004672 GO:0004674 GO:0005488 GO:0005524 GO:0006464 GO:0006468 GO:0006793 GO:0006796 GO:0008150 GO:0008152 GO:0009987 GO:0016301 GO:0016310 GO:0016740 GO:0016772 GO:0016773 GO:0017076 GO:0019538 GO:0030554 GO:0032553 GO:0032555 GO:0032559 GO:0035639 GO:0043170 GO:0043412 GO:0044237 GO:0044238 GO:0044260 GO:0044267		FBgn0260399
Megalin	mgl	4e-41	169	005578	0.463848	0.578593	0.829385	0.958208	0.000353761	0.00411648	Low density lipoprotein receptor-related protein 2	GO:0000267 GO:0003674 GO:0004872 GO:0005488 GO:0005515 GO:0005575 GO:0005622 GO:0005623 GO:0005624 GO:0005626 GO:0005737 GO:0005768 GO:0005783 GO:0005794 GO:0005886 GO:0005903 GO:0005905 GO:0006766 GO:0006810 GO:0006897 GO:0006898 GO:0007275 GO:0007399 GO:0007417 GO:0007420 GO:0008150 GO:0008152 GO:0008283 GO:0009987 GO:0010324 GO:0012505 GO:0016020 GO:0016021 GO:0016023 GO:0016043 GO:0016044 GO:…
cAMP-dependent protein kinase 3	Pka-C3	5e-34	142	002231	7.50489	7.83408	7.94386	7.9	0.00238703	0.0193882	Calcium/calmodulin-dependent protein kinase (CaM kinase) II delta 2	GO:0000082 GO:0000166 GO:0000278 GO:0002376 GO:0003008 GO:0003012 GO:0003013 GO:0003015 GO:0003674 GO:0003824 GO:0004672 GO:0004674 GO:0004683 GO:0005488 GO:0005515 GO:0005516 GO:0005524 GO:0005575 GO:0005622 GO:0005623 GO:0005634 GO:0005654 GO:0005737 GO:0005783 GO:0005789 GO:0005829 GO:0005886 GO:0005954 GO:0006464 GO:0006468 GO:0006793 GO:0006796 GO:0006810 GO:0006811 GO:0006812 GO:0006816 GO:…	map04012 map04020 map04114 map04310 map04720 map04722 map04725 map04728 map04740 map04745 map04912 map04916 map04971 map05031 map05152 map05214
shaggy	sgg	2e-39	160	006827	2.85107	3.06025	3.34286	3.1657	0.00408038	0.0299816	Cell division protein kinase 5 homolog	GO:0000166 GO:0000307 GO:0000902 GO:0000904 GO:0001764 GO:0001932 GO:0001963 GO:0002039 GO:0003008 GO:0003674 GO:0003824 GO:0004672 GO:0004674 GO:0004693 GO:0005102 GO:0005176 GO:0005488 GO:0005515 GO:0005524 GO:0005575 GO:0005622 GO:0005623 GO:0005634 GO:0005737 GO:0005829 GO:0005856 GO:0005886 GO:0006325 GO:0006355 GO:0006464 GO:0006468 GO:0006793 GO:0006796 GO:0006810 GO:0006873 GO:0006886 GO:…	map04360 map05010 map05030
cAMP-dependent protein kinase 3	Pka-C3	2e-50	196	002788	0.567596	0.789532	1.36151	0.805597	0.00545569	0.0378826	Putative cAMP-dependent protein kinase type 3	GO:0000166 GO:0003674 GO:0003824 GO:0004672 GO:0004674 GO:0004690 GO:0004691 GO:0005488 GO:0005524 GO:0005575 GO:0005622 GO:0005623 GO:0005634 GO:0005737 GO:0005886 GO:0006464 GO:0006468 GO:0006793 GO:0006796 GO:0008150 GO:0008152 GO:0009987 GO:0016020 GO:0016301 GO:0016310 GO:0016740 GO:0016772 GO:0016773 GO:0017076 GO:0019538 GO:0030554 GO:0032553 GO:0032555 GO:0032559 GO:0035639 GO:0043170 GO:…
cAMP-dependent protein kinase 3	Pka-C3	9e-44	174	008268	8.59185	8.74574	8.26442	8.25366	0.00561172	0.0386969	3-phosphoinositide-dependent protein kinase 1	GO:0000166 GO:0001932 GO:0002682 GO:0002684 GO:0002694 GO:0003008 GO:0003674 GO:0003824 GO:0004672 GO:0004674 GO:0004676 GO:0005102 GO:0005158 GO:0005488 GO:0005515 GO:0005524 GO:0005543 GO:0005575 GO:0005622 GO:0005623 GO:0005634 GO:0005737 GO:0005829 GO:0005886 GO:0005912 GO:0005924 GO:0005925 GO:0006139 GO:0006351 GO:0006355 GO:0006464 GO:0006468 GO:0006469 GO:0006793 GO:0006796 GO:0006807 GO:…	map03320 map04150 map04510 map04910 map04960 map05213 map05215 map05223	FBgn0020386
wingless	wg	2e-51	199	013043	0.873418	1.31201	1.34173	1.37572	0.00723266	0.0475139	Wingless-type MMTV integration site family, member 5A (Fragment)	GO:0000902 GO:0000904 GO:0001568 GO:0001654 GO:0001664 GO:0001701 GO:0001759 GO:0001837 GO:0001890 GO:0001892 GO:0001944 GO:0002009 GO:0002053 GO:0002088 GO:0003002 GO:0003007 GO:0003156 GO:0003205 GO:0003206 GO:0003209 GO:0003228 GO:0003230 GO:0003674 GO:0005102 GO:0005109 GO:0005110 GO:0005125 GO:0005488 GO:0005515 GO:0005575 GO:0005576 GO:0005578 GO:0005615 GO:0005622 GO:0005623 GO:0005737 GO:…	map04310 map04340 map04916 map05166 map05200 map05217
Megalin	mgl	5e-23	108	015725	0.0994013	0.052106	0.32954	0.179981	0.0114285	0.0693406	Low-density lipoprotein receptor-related protein 2	GO:0003674 GO:0004872		FBgn0001253
Wnt oncogene analog 6	Wnt6	8e-24	107	012018	1.69253	1.91605	1.96211	2.23155	0.025624	0.134893	Secreted protein Wnt7	GO:0003674 GO:0005102 GO:0005488 GO:0005515 GO:0005575 GO:0005576 GO:0005578 GO:0007154 GO:0007165 GO:0007166 GO:0007275 GO:0008150 GO:0009987 GO:0016055 GO:0023052 GO:0031012 GO:0032501 GO:0032502 GO:0044421 GO:0050789 GO:0050794 GO:0050896 GO:0051716 GO:0065007
Megalin	mgl	2e-28	126	011600	0.222209	0.337486	0.473249	0.568799	0.0343277	0.170128
cAMP-dependent protein kinase 1	Pka-C1	4e-34	141	002027	1.83644	1.90131	2.37949	2.35733	0.0589401	0.2645	Foraging (Fragment)	GO:0000166 GO:0003674 GO:0003824 GO:0004672 GO:0004674 GO:0004690 GO:0004692 GO:0005488 GO:0005524 GO:0005575 GO:0005622 GO:0005623 GO:0005737 GO:0006464 GO:0006468 GO:0006793 GO:0006796 GO:0008150 GO:0008152 GO:0009987 GO:0016301 GO:0016310 GO:0016740 GO:0016772 GO:0016773 GO:0017076 GO:0019001 GO:0019002 GO:0019222 GO:0019538 GO:0030551 GO:0030553 GO:0030554 GO:0031323 GO:0032553 GO:0032555 GO:…	map04540 map04730 map04740 map04970
patched	ptc	0	917	007513	0.92718	0.672232	0.649372	0.469458	0.0604625	0.270168	Putative hedgehog receptor	GO:0000003 GO:0000902 GO:0000904 GO:0001654 GO:0001746 GO:0002165 GO:0003002 GO:0003006 GO:0003674 GO:0004871 GO:0004872 GO:0004888 GO:0005488 GO:0005515 GO:0005575 GO:0005622 GO:0005623 GO:0005737 GO:0005886 GO:0005887 GO:0006508 GO:0006793 GO:0006796 GO:0006810 GO:0006897 GO:0006898 GO:0006935 GO:0007154 GO:0007165 GO:0007166 GO:0007224 GO:0007275 GO:0007276 GO:0007281 GO:0007292 GO:0007346 GO:…	map04340 map05200 map05217	FBgn0003892
gilgamesh	gish	3e-83	305	008894	2.67141	2.40155	2.83064	2.67783	0.0880591	0.369693	Casein kinase I isoform gamma-2	GO:0000166 GO:0000267 GO:0000287 GO:0001948 GO:0003674 GO:0003824 GO:0004672 GO:0004674 GO:0005488 GO:0005515 GO:0005524 GO:0005575 GO:0005622 GO:0005623 GO:0005625 GO:0005737 GO:0006464 GO:0006468 GO:0006793 GO:0006796 GO:0007154 GO:0007165 GO:0007166 GO:0008150 GO:0008152 GO:0009987 GO:0016055 GO:0016301 GO:0016310 GO:0016740 GO:0016772 GO:0016773 GO:0017076 GO:0019538 GO:0023052 GO:0030554 GO:…	map04340
Casein kinase Ialpha	CkIalpha	1e-29	126	014721	4.48715	4.68065	4.87955	4.7558	0.090801	0.379769	Casein kinase I isoform alpha	GO:0000087 GO:0000166 GO:0000278 GO:0000279 GO:0000280 GO:0000775 GO:0000776 GO:0000777 GO:0000779 GO:0000793 GO:0000902 GO:0003674 GO:0003824 GO:0004672 GO:0004674 GO:0005488 GO:0005524 GO:0005575 GO:0005622 GO:0005623 GO:0005634 GO:0005654 GO:0005694 GO:0005737 GO:0005815 GO:0005847 GO:0005849 GO:0005856 GO:0006464 GO:0006468 GO:0006793 GO:0006796 GO:0006996 GO:0007049 GO:0007067 GO:0007154 GO:…
shaggy	sgg	3e-31	132	005297	2.40695	2.4935	2.61281	2.71023	0.114436	0.459703	Cell division protein kinase 7	GO:0000166 GO:0000267 GO:0000279 GO:0003674 GO:0003824 GO:0004672 GO:0004674 GO:0004693 GO:0005488 GO:0005515 GO:0005524 GO:0005575 GO:0005622 GO:0005623 GO:0005624 GO:0005626 GO:0005634 GO:0005654 GO:0005667 GO:0005675 GO:0005737 GO:0005739 GO:0005829 GO:0005856 GO:0006139 GO:0006163 GO:0006195 GO:0006200 GO:0006259 GO:0006281 GO:0006351 GO:0006355 GO:0006357 GO:0006366 GO:0006464 GO:0006468 GO:…	map03022 map03420 map04110
Megalin	mgl	1e-32	140	008010	0.129903	0.154702	0.0301923	0.0881685	0.126697	0.502058	Low-density lipoprotein receptor-related protein 6 (Fragment)	GO:0001501 GO:0001654 GO:0001667 GO:0001702 GO:0001763 GO:0001932 GO:0002009 GO:0002053 GO:0003002 GO:0003008 GO:0003674 GO:0004871 GO:0004872 GO:0004888 GO:0005488 GO:0005515 GO:0005575 GO:0005622 GO:0005623 GO:0005737 GO:0005783 GO:0005886 GO:0006355 GO:0006357 GO:0006469 GO:0006810 GO:0006897 GO:0006928 GO:0007154 GO:0007165 GO:0007166 GO:0007267 GO:0007275 GO:0007369 GO:0007389 GO:0007423 GO:…
Megalin	mgl	8e-50	197	005595	1.39499	1.43187	1.63596	1.66209	0.167518	0.631392	Hypothetical protein
fused	fu	7e-30	129	014261	3.26902	3.28009	2.86152	3.2229	0.204999	0.749444	Unc-51-like kinase 3	GO:0000166 GO:0003674 GO:0003824 GO:0004672 GO:0004674 GO:0005488 GO:0005524 GO:0005575 GO:0005622 GO:0005623 GO:0005737 GO:0006464 GO:0006468 GO:0006793 GO:0006796 GO:0006914 GO:0008150 GO:0008152 GO:0008589 GO:0009056 GO:0009966 GO:0009967 GO:0009968 GO:0009987 GO:0010646 GO:0010647 GO:0010648 GO:0016301 GO:0016310 GO:0016740 GO:0016772 GO:0016773 GO:0017076 GO:0019538 GO:0023051 GO:0023056 GO:…	map04140 map04150	FBgn0260945
gasket	gskt	4e-39	159	010236	0.484681	0.350672	0.679818	0.487159	0.20753	0.757534	Cdc2	GO:0000075 GO:0000077 GO:0000080 GO:0000086 GO:0000087 GO:0000166 GO:0000278 GO:0000279 GO:0000280 GO:0000302 GO:0003674 GO:0003824 GO:0004672 GO:0004674 GO:0004693 GO:0005488 GO:0005515 GO:0005524 GO:0005575 GO:0005622 GO:0005623 GO:0005634 GO:0005654 GO:0005737 GO:0005739 GO:0005819 GO:0005829 GO:0005856 GO:0005874 GO:0005876 GO:0006139 GO:0006259 GO:0006275 GO:0006323 GO:0006325 GO:0006461 GO:…
cAMP-dependent protein kinase 1	Pka-C1	0	645	001964	0.380345	0.340644	0.227432	0.212865	0.227911	0.820076	Putative cAMP-dependent protein kinase catalytic subunit	GO:0000166 GO:0000267 GO:0000287 GO:0001704 GO:0001707 GO:0003674 GO:0003824 GO:0004672 GO:0004674 GO:0004690 GO:0004691 GO:0005488 GO:0005515 GO:0005524 GO:0005575 GO:0005622 GO:0005623 GO:0005624 GO:0005626 GO:0005634 GO:0005737 GO:0005739 GO:0005813 GO:0005815 GO:0005829 GO:0005856 GO:0005886 GO:0005952 GO:0006464 GO:0006468 GO:0006793 GO:0006796 GO:0007275 GO:0007369 GO:0007498 GO:0008150 GO:…	map04010 map04020 map04062 map04113 map04114 map04210 map04270 map04310 map04340 map04540 map04720 map04723 map04724 map04725 map04726 map04727 map04728 map04740 map04742 map04910 map04912 map04914 map04916 map04961 map04962 map04970 map04971 map04976 map05020 map05030 map05031 map05032 map05110 map05146 map05166 map05169 map05414
fused	fu	4e-36	149	003116	4.50142	4.64484	4.69426	4.85337	0.259884	0.916135	Serine/threonine-protein kinase PLK4	GO:0000003 GO:0000166 GO:0000226 GO:0000278 GO:0000279 GO:0001578 GO:0003006 GO:0003674 GO:0003824 GO:0004672 GO:0004674 GO:0004713 GO:0005488 GO:0005524 GO:0005575 GO:0005622 GO:0005623 GO:0005737 GO:0005813 GO:0005814 GO:0005815 GO:0005856 GO:0006464 GO:0006468 GO:0006793 GO:0006796 GO:0006996 GO:0007010 GO:0007017 GO:0007049 GO:0007051 GO:0007052 GO:0007098 GO:0007099 GO:0007276 GO:0007281 GO:…
cAMP-dependent protein kinase 1	Pka-C1	3e-36	149	000424	7.03648	6.97631	7.11601	6.98325	1	1	Calcium/calmodulin-dependent protein kinase type 1D	GO:0000166 GO:0002682 GO:0002684 GO:0002685 GO:0002687 GO:0002688 GO:0002690 GO:0003674 GO:0003824 GO:0004672 GO:0004674 GO:0004683 GO:0005488 GO:0005515 GO:0005516 GO:0005524 GO:0005575 GO:0005622 GO:0005623 GO:0005634 GO:0005737 GO:0005954 GO:0006355 GO:0006464 GO:0006468 GO:0006793 GO:0006796 GO:0006950 GO:0006952 GO:0006954 GO:0007275 GO:0007399 GO:0008150 GO:0008152 GO:0009611 GO:0009889 GO:…
cAMP-dependent protein kinase 1	Pka-C1	1e-34	143	000883	2.12866	1.89636	3.86928	1.86099	1	1	AMP-activated protein kinase alpha 2	GO:0000166 GO:0001666 GO:0003674 GO:0003682 GO:0003824 GO:0004672 GO:0004674 GO:0004679 GO:0005488 GO:0005515 GO:0005524 GO:0005575 GO:0005622 GO:0005623 GO:0005634 GO:0005654 GO:0005737 GO:0005829 GO:0005886 GO:0005975 GO:0005996 GO:0006006 GO:0006066 GO:0006082 GO:0006109 GO:0006110 GO:0006139 GO:0006325 GO:0006351 GO:0006355 GO:0006461 GO:0006464 GO:0006468 GO:0006629 GO:0006631 GO:0006633 GO:…	map04140 map04150 map04910 map04920 map05410
cAMP-dependent protein kinase 1	Pka-C1	2e-28	122	001378	0.625763	0.585487	0.577846	0.581511	1	1	Atypical protein kinase C, isoform B	GO:0000003 GO:0000132 GO:0000166 GO:0000226 GO:0000267 GO:0000278 GO:0000578 GO:0000902 GO:0000904 GO:0001654 GO:0001667 GO:0001704 GO:0001707 GO:0001709 GO:0001738 GO:0001745 GO:0001763 GO:0001775 GO:0001817 GO:0001819 GO:0001838 GO:0001841 GO:0001932 GO:0001933 GO:0002009 GO:0002052 GO:0002064 GO:0002682 GO:0002684 GO:0002694 GO:0002696 GO:0002697 GO:0002699 GO:0002700 GO:0002702 GO:0002703 GO:…	map04144 map04530 map04910	FBgn0261854
cAMP-dependent protein kinase 1	Pka-C1	8e-64	240	001740	0.782041	1.17014	0.841513	1.01369	1	1	Serine/threonine-protein kinase N2 (Fragment)	GO:0000166 GO:0003674 GO:0003824 GO:0004672 GO:0004674 GO:0004697 GO:0005488 GO:0005524 GO:0005575 GO:0005622 GO:0005623 GO:0006464 GO:0006468 GO:0006793 GO:0006796 GO:0007154 GO:0007165 GO:0008150 GO:0008152 GO:0009987 GO:0016301 GO:0016310 GO:0016740 GO:0016772 GO:0016773 GO:0017076 GO:0019538 GO:0023052 GO:0030554 GO:0032553 GO:0032555 GO:0032559 GO:0035639 GO:0043170 GO:0043412 GO:0044237 GO:…	map05132	FBgn0020621
cAMP-dependent protein kinase 1	Pka-C1	4e-115	410	005372	0	0	0	0.0151696	1	1	Putative cAMP-dependent protein kinase catalytic subunit	GO:0000166 GO:0000267 GO:0000287 GO:0001704 GO:0001707 GO:0003674 GO:0003824 GO:0004672 GO:0004674 GO:0004690 GO:0004691 GO:0005488 GO:0005515 GO:0005524 GO:0005575 GO:0005622 GO:0005623 GO:0005624 GO:0005626 GO:0005634 GO:0005737 GO:0005739 GO:0005813 GO:0005815 GO:0005829 GO:0005856 GO:0005886 GO:0005952 GO:0006464 GO:0006468 GO:0006793 GO:0006796 GO:0007154 GO:0007165 GO:0007166 GO:0007275 GO:…
cAMP-dependent protein kinase 1	Pka-C1	1e-39	159	008644	5.27442	6.1389	5.90854	5.85196	1	1	Protein kinase C	GO:0000166 GO:0000267 GO:0001775 GO:0002376 GO:0002682 GO:0002684 GO:0003008 GO:0003674 GO:0003824 GO:0004672 GO:0004674 GO:0004697 GO:0005488 GO:0005515 GO:0005524 GO:0005575 GO:0005622 GO:0005623 GO:0005624 GO:0005626 GO:0005634 GO:0005737 GO:0005739 GO:0005829 GO:0005886 GO:0006139 GO:0006325 GO:0006355 GO:0006464 GO:0006468 GO:0006793 GO:0006796 GO:0006807 GO:0006915 GO:0006950 GO:0006996 GO:…	map04010 map04011 map04012 map04020 map04070 map04270 map04310 map04370 map04510 map04530 map04540 map04650 map04666 map04670 map04720 map04723 map04724 map04725 map04726 map04727 map04728 map04730 map04745 map04916 map04960 map04961 map04970 map04971 map04972 map05031 map05032 map05110 map05143 map05146 map05200 map05214 map05223	FBgn0004784;FBgn0003091
cAMP-dependent protein kinase 1	Pka-C1	5e-27	105	010872	2.09808	1.40773	1.08687	1.56597	1	1	Protein kinase C, epsilon (Fragment)	GO:0000166 GO:0001775 GO:0001816 GO:0001932 GO:0002250 GO:0002252 GO:0002376 GO:0002443 GO:0002449 GO:0002460 GO:0003674 GO:0003824 GO:0004672 GO:0004674 GO:0004697 GO:0005488 GO:0005515 GO:0005524 GO:0005575 GO:0005622 GO:0005623 GO:0005634 GO:0005737 GO:0005783 GO:0005829 GO:0005886 GO:0005911 GO:0006464 GO:0006468 GO:0006793 GO:0006796 GO:0006915 GO:0006950 GO:0006955 GO:0007154 GO:0007165 GO:…	map04270 map04530
cAMP-dependent protein kinase 1	Pka-C1	2e-109	392	012126	0.108386	0	0.182284	0	1	1	Putative cAMP-dependent protein kinase catalytic subunit	GO:0000166 GO:0000267 GO:0000287 GO:0001704 GO:0001707 GO:0003674 GO:0003824 GO:0004672 GO:0004674 GO:0004690 GO:0004691 GO:0005488 GO:0005515 GO:0005524 GO:0005575 GO:0005622 GO:0005623 GO:0005624 GO:0005626 GO:0005634 GO:0005737 GO:0005739 GO:0005813 GO:0005815 GO:0005829 GO:0005856 GO:0005886 GO:0005952 GO:0006464 GO:0006468 GO:0006793 GO:0006796 GO:0007154 GO:0007165 GO:0007166 GO:0007275 GO:…
cAMP-dependent protein kinase 1	Pka-C1	3e-96	348	012127	0.0749016	0	0.0894179	0	1	1	Putative cAMP-dependent protein kinase catalytic subunit	GO:0000166 GO:0000267 GO:0000287 GO:0001704 GO:0001707 GO:0003674 GO:0003824 GO:0004672 GO:0004674 GO:0004690 GO:0004691 GO:0005488 GO:0005515 GO:0005524 GO:0005575 GO:0005622 GO:0005623 GO:0005624 GO:0005625 GO:0005626 GO:0005634 GO:0005737 GO:0005739 GO:0005813 GO:0005815 GO:0005829 GO:0005856 GO:0005886 GO:0005952 GO:0006464 GO:0006468 GO:0006793 GO:0006796 GO:0007154 GO:0007165 GO:0007166 GO:…
cAMP-dependent protein kinase 2	Pka-C2	2e-27	119	007855	2.02859	2.76155	2.48628	2.08749	1	1	CHK2	GO:0000003 GO:0000075 GO:0000077 GO:0000086 GO:0000087 GO:0000166 GO:0000226 GO:0000278 GO:0000279 GO:0000280 GO:0000724 GO:0000725 GO:0000781 GO:0003006 GO:0003674 GO:0003824 GO:0004672 GO:0004674 GO:0005488 GO:0005515 GO:0005524 GO:0005575 GO:0005622 GO:0005623 GO:0005634 GO:0005654 GO:0005694 GO:0006139 GO:0006259 GO:0006281 GO:0006302 GO:0006310 GO:0006351 GO:0006355 GO:0006357 GO:0006464 GO:…	map04110 map04111 map04115 map05166
costa	cos	9e-22	102	002468	3.75117	2.41358	2.9834	2.62406	1	1	KIF5B	GO:0000166 GO:0003674 GO:0003774 GO:0003777 GO:0003824 GO:0005488 GO:0005515 GO:0005524 GO:0005575 GO:0005622 GO:0005623 GO:0005737 GO:0005856 GO:0005871 GO:0005874 GO:0005875 GO:0005929 GO:0006810 GO:0006928 GO:0007017 GO:0007018 GO:0007028 GO:0008017 GO:0008092 GO:0008150 GO:0008152 GO:0009987 GO:0010970 GO:0015630 GO:0015631 GO:0016043 GO:0016462 GO:0016787 GO:0016817 GO:0016818 GO:0017076 GO:…	map04728
costa	cos	2e-72	270	006384	1.44848	1.31772	1.38802	1.68869	1	1	Hypothetical protein	GO:0000166 GO:0003674 GO:0003774 GO:0003777 GO:0003824 GO:0005488 GO:0005524 GO:0005575 GO:0005622 GO:0005623 GO:0005856 GO:0005874 GO:0006928 GO:0007017 GO:0007018 GO:0008150 GO:0008152 GO:0009987 GO:0015630 GO:0016462 GO:0016787 GO:0016817 GO:0016818 GO:0017076 GO:0017111 GO:0030554 GO:0032553 GO:0032555 GO:0032559 GO:0032991 GO:0035639 GO:0043226 GO:0043228 GO:0043229 GO:0043232 GO:0043234 GO:…	map04340 map05200 map05217	FBgn0000352
cAMP-dependent protein kinase 3	Pka-C3	2e-31	133	002787	1.19286	1.05409	1.89419	1.17618	1	1	Putative camp-dependent protein kinase catalytic subunit	GO:0000166 GO:0003674 GO:0003824 GO:0004672 GO:0004674 GO:0004690 GO:0004691 GO:0005488 GO:0005524 GO:0005575 GO:0005622 GO:0005623 GO:0005634 GO:0005737 GO:0005886 GO:0006464 GO:0006468 GO:0006793 GO:0006796 GO:0008150 GO:0008152 GO:0009987 GO:0016020 GO:0016301 GO:0016310 GO:0016740 GO:0016772 GO:0016773 GO:0017076 GO:0019538 GO:0030554 GO:0032553 GO:0032555 GO:0032559 GO:0035639 GO:0043170 GO:…
cAMP-dependent protein kinase 3	Pka-C3	3e-22	102	002789	1.33506	0.906819	1.8539	1.06634	1	1	Putative camp-dependent protein kinase catalytic subunit	GO:0000166 GO:0003674 GO:0003824 GO:0004672 GO:0004674 GO:0004690 GO:0004691 GO:0005488 GO:0005524 GO:0005575 GO:0005622 GO:0005623 GO:0005634 GO:0005737 GO:0005886 GO:0006464 GO:0006468 GO:0006793 GO:0006796 GO:0008150 GO:0008152 GO:0009987 GO:0016020 GO:0016301 GO:0016310 GO:0016740 GO:0016772 GO:0016773 GO:0017076 GO:0019538 GO:0030554 GO:0032553 GO:0032555 GO:0032559 GO:0035639 GO:0043170 GO:…
cAMP-dependent protein kinase 3	Pka-C3	1e-32	137	006288	0.449525	0.24595	0.362973	0.174767	1	1	Ribosomal protein S6 kinase beta-2	GO:0000166 GO:0000287 GO:0003674 GO:0003824 GO:0004672 GO:0004674 GO:0005488 GO:0005524 GO:0006464 GO:0006468 GO:0006793 GO:0006796 GO:0007154 GO:0007165 GO:0007243 GO:0008150 GO:0008152 GO:0009987 GO:0016301 GO:0016310 GO:0016740 GO:0016772 GO:0016773 GO:0017076 GO:0019538 GO:0023052 GO:0030554 GO:0032553 GO:0032555 GO:0032559 GO:0035556 GO:0035639 GO:0043167 GO:0043169 GO:0043170 GO:0043412 GO:…	map04010 map04114 map04150 map04720 map04722 map04914	FBgn0262866
cAMP-dependent protein kinase 3	Pka-C3	3e-25	112	007499	1.05219	1.62011	1.17439	1.51169	1	1	Serine/threonine-protein kinase zyg-8	GO:0000166 GO:0000226 GO:0000278 GO:0000922 GO:0001932 GO:0003008 GO:0003674 GO:0003824 GO:0004672 GO:0004674 GO:0004683 GO:0005488 GO:0005515 GO:0005516 GO:0005524 GO:0005575 GO:0005622 GO:0005623 GO:0005634 GO:0005737 GO:0005813 GO:0005815 GO:0005819 GO:0005856 GO:0005874 GO:0005876 GO:0005954 GO:0006355 GO:0006461 GO:0006464 GO:0006468 GO:0006793 GO:0006796 GO:0006810 GO:0006913 GO:0006996 GO:…
cAMP-dependent protein kinase 3	Pka-C3	4e-55	212	007552	2.11386	1.53584	2.09006	1.71811	1	1	Rho-associated, coiled-coil containing protein kinase 1	GO:0000166 GO:0003674 GO:0003824 GO:0004672 GO:0004674 GO:0005488 GO:0005524 GO:0005575 GO:0005622 GO:0005623 GO:0006464 GO:0006468 GO:0006793 GO:0006796 GO:0007154 GO:0007165 GO:0008150 GO:0008152 GO:0009987 GO:0016301 GO:0016310 GO:0016740 GO:0016772 GO:0016773 GO:0017076 GO:0019538 GO:0023052 GO:0030554 GO:0032553 GO:0032555 GO:0032559 GO:0035639 GO:0043170 GO:0043412 GO:0044237 GO:0044238 GO:…	map04062 map04270 map04310 map04350 map04360 map04510 map04670 map04810 map05130 map05131 map05132
cAMP-dependent protein kinase 3	Pka-C3	1e-57	220	011043	3.39682	4.14963	4.13696	4.23306	1	1	PKG-Ib	GO:0000166 GO:0003674 GO:0003824 GO:0004672 GO:0004674 GO:0004690 GO:0004692 GO:0005488 GO:0005524 GO:0006464 GO:0006468 GO:0006793 GO:0006796 GO:0008150 GO:0008152 GO:0009987 GO:0016301 GO:0016310 GO:0016740 GO:0016772 GO:0016773 GO:0017076 GO:0019538 GO:0030554 GO:0032553 GO:0032555 GO:0032559 GO:0035639 GO:0043170 GO:0043412 GO:0044237 GO:0044238 GO:0044260 GO:0044267	map04540 map04730 map04740 map04970
cAMP-dependent protein kinase 3	Pka-C3	4e-45	179	011117	2.74524	2.63681	2.63175	2.51649	0.761191	1	Glutamate receptor 4, putative	GO:0000087 GO:0000166 GO:0000226 GO:0000278 GO:0000279 GO:0000280 GO:0000775 GO:0000793 GO:0000922 GO:0003674 GO:0003824 GO:0004672 GO:0004674 GO:0004871 GO:0004872 GO:0004888 GO:0004970 GO:0005215 GO:0005216 GO:0005230 GO:0005231 GO:0005234 GO:0005488 GO:0005515 GO:0005524 GO:0005575 GO:0005622 GO:0005623 GO:0005634 GO:0005694 GO:0005737 GO:0005813 GO:0005815 GO:0005819 GO:0005856 GO:0005874 GO:…
cAMP-dependent protein kinase 3	Pka-C3	2e-38	156	011624	1.93233	2.90059	0.599155	2.08092	1	1	Aurora kinase C	GO:0000003 GO:0000087 GO:0000166 GO:0000226 GO:0000228 GO:0000278 GO:0000279 GO:0000280 GO:0000775 GO:0000776 GO:0000777 GO:0000779 GO:0000780 GO:0000793 GO:0000794 GO:0000910 GO:0000922 GO:0001709 GO:0003006 GO:0003674 GO:0003824 GO:0004672 GO:0004674 GO:0005488 GO:0005515 GO:0005524 GO:0005575 GO:0005622 GO:0005623 GO:0005634 GO:0005694 GO:0005737 GO:0005813 GO:0005815 GO:0005819 GO:0005856 GO:…		FBgn0000147;FBgn0024227
fused	fu	2e-25	114	000324	0.511775	0.759975	0.622208	0.671469	1	1	Cdk1	GO:0000003 GO:0000075 GO:0000077 GO:0000082 GO:0000086 GO:0000087 GO:0000166 GO:0000278 GO:0000279 GO:0000280 GO:0000302 GO:0003674 GO:0003824 GO:0004672 GO:0004674 GO:0004693 GO:0005488 GO:0005515 GO:0005524 GO:0005575 GO:0005622 GO:0005623 GO:0005634 GO:0005654 GO:0005737 GO:0005739 GO:0005819 GO:0005856 GO:0005874 GO:0005876 GO:0006139 GO:0006259 GO:0006275 GO:0006323 GO:0006325 GO:0006461 GO:…	map04110 map04114 map04115 map04914 map05162 map05168 map05169 map05200 map05215 map05222
fused	fu	3e-25	113	001222	0.676126	0.9957	0.810874	0.641454	1	1	CaM-KK 1	GO:0000165 GO:0000166 GO:0000267 GO:0001932 GO:0003674 GO:0003824 GO:0004672 GO:0004674 GO:0004683 GO:0004713 GO:0005488 GO:0005509 GO:0005515 GO:0005516 GO:0005524 GO:0005575 GO:0005622 GO:0005623 GO:0005625 GO:0005634 GO:0005737 GO:0006355 GO:0006464 GO:0006468 GO:0006793 GO:0006796 GO:0007154 GO:0007165 GO:0007243 GO:0008150 GO:0008152 GO:0009889 GO:0009891 GO:0009893 GO:0009987 GO:0010468 GO:…	map04920 map05034
fused	fu	1e-22	105	001840	9.16125	10.1	9.26658	10.57	1	1	Non-specific serine/threonine protein kinase	GO:0000166 GO:0003674 GO:0003824 GO:0004672 GO:0004674 GO:0005488 GO:0005524 GO:0006464 GO:0006468 GO:0006793 GO:0006796 GO:0008150 GO:0008152 GO:0009987 GO:0016301 GO:0016310 GO:0016740 GO:0016772 GO:0016773 GO:0017076 GO:0019538 GO:0030554 GO:0032553 GO:0032555 GO:0032559 GO:0035639 GO:0043170 GO:0043412 GO:0044237 GO:0044238 GO:0044260 GO:0044267	map04010	FBgn0031030
fused	fu	3e-27	120	002332	4.17448	4.4256	4.30302	4.27989	1	1	P21-activated kinase 2	GO:0000166 GO:0003674 GO:0003824 GO:0004672 GO:0004674 GO:0005488 GO:0005524 GO:0006464 GO:0006468 GO:0006793 GO:0006796 GO:0008150 GO:0008152 GO:0009987 GO:0016301 GO:0016310 GO:0016740 GO:0016772 GO:0016773 GO:0017076 GO:0019538 GO:0030554 GO:0032553 GO:0032555 GO:0032559 GO:0035639 GO:0043170 GO:0043412 GO:0044237 GO:0044238 GO:0044260 GO:0044267	map04010 map04011 map04012 map04062 map04360 map04510 map04650 map04660 map04666 map04810 map05120 map05211
fused	fu	5e-25	112	005787	0.140285	0.327119	0.403772	0.18239	1	1	Testis-specific serine/threonine-protein kinase 4	GO:0000003 GO:0000166 GO:0000287 GO:0001669 GO:0003006 GO:0003674 GO:0003824 GO:0004672 GO:0004674 GO:0005488 GO:0005515 GO:0005524 GO:0005575 GO:0005622 GO:0005623 GO:0005737 GO:0005813 GO:0005814 GO:0005815 GO:0005856 GO:0006139 GO:0006259 GO:0006323 GO:0006325 GO:0006355 GO:0006464 GO:0006468 GO:0006793 GO:0006796 GO:0006807 GO:0006996 GO:0006997 GO:0007275 GO:0007276 GO:0007281 GO:0007283 GO:…
fused	fu	1e-99	360	008220	2.27157	2.37632	2.24692	2.30708	1	1	Hypothetical protein	GO:0000166 GO:0003674 GO:0003824 GO:0004672 GO:0004674 GO:0005488 GO:0005524 GO:0006464 GO:0006468 GO:0006793 GO:0006796 GO:0008150 GO:0008152 GO:0009987 GO:0016301 GO:0016310 GO:0016740 GO:0016772 GO:0016773 GO:0017076 GO:0019538 GO:0030554 GO:0032553 GO:0032555 GO:0032559 GO:0035639 GO:0043170 GO:0043412 GO:0044237 GO:0044238 GO:0044260 GO:0044267	map04340 map05200 map05217
fused	fu	1e-25	115	009848	2.51316	2.79145	2.45329	2.34409	0.817289	1	Hypothetical protein
fused	fu	6e-29	125	010221	0.0289152	0.243523	0.285828	0.21905	1	1	Testis-specific serine/threonine-protein kinase 6	GO:0000003 GO:0000166 GO:0000287 GO:0001669 GO:0003006 GO:0003674 GO:0003824 GO:0004672 GO:0004674 GO:0005488 GO:0005515 GO:0005524 GO:0005575 GO:0005622 GO:0005623 GO:0005737 GO:0005813 GO:0005814 GO:0005815 GO:0005856 GO:0006139 GO:0006259 GO:0006323 GO:0006325 GO:0006355 GO:0006464 GO:0006468 GO:0006793 GO:0006796 GO:0006807 GO:0006996 GO:0006997 GO:0007275 GO:0007276 GO:0007281 GO:0007283 GO:…
fused	fu	2e-22	104	011207	0	0.0288965	0	0.062183	1	1	Myosin IIIA	GO:0000146 GO:0000166 GO:0003008 GO:0003674 GO:0003774 GO:0003779 GO:0003824 GO:0004672 GO:0004674 GO:0004713 GO:0005488 GO:0005515 GO:0005516 GO:0005524 GO:0005575 GO:0005622 GO:0005623 GO:0005737 GO:0005856 GO:0005884 GO:0006139 GO:0006163 GO:0006195 GO:0006200 GO:0006464 GO:0006468 GO:0006753 GO:0006793 GO:0006796 GO:0006807 GO:0007600 GO:0007601 GO:0007605 GO:0008092 GO:0008150 GO:0008152 GO:…	map04745
fused	fu	4e-24	110	012995	7.02016	6.63994	6.68895	6.70224	1	1	ST17A	GO:0000166 GO:0003674 GO:0003824 GO:0004672 GO:0004674 GO:0005488 GO:0005524 GO:0005575 GO:0005622 GO:0005623 GO:0005634 GO:0006464 GO:0006468 GO:0006793 GO:0006796 GO:0006917 GO:0007154 GO:0007165 GO:0007243 GO:0008150 GO:0008152 GO:0009987 GO:0010941 GO:0010942 GO:0012502 GO:0016301 GO:0016310 GO:0016740 GO:0016772 GO:0016773 GO:0017076 GO:0019222 GO:0019538 GO:0023052 GO:0030554 GO:0031323 GO:…
fused	fu	2e-25	114	013877	5.28058	5.24104	5.28133	5.24105	1	1	P21 protein (Cdc42/Rac)-activated kinase 3	GO:0000165 GO:0000166 GO:0000187 GO:0000267 GO:0000902 GO:0000904 GO:0001666 GO:0001932 GO:0001934 GO:0002253 GO:0002376 GO:0002429 GO:0002682 GO:0002684 GO:0002694 GO:0002696 GO:0002757 GO:0002764 GO:0002768 GO:0003674 GO:0003824 GO:0004672 GO:0004674 GO:0004708 GO:0004712 GO:0005488 GO:0005515 GO:0005524 GO:0005575 GO:0005622 GO:0005623 GO:0005624 GO:0005626 GO:0005634 GO:0005635 GO:0005737 GO:…
discs overgrown	dco	1e-119	426	009497	1.33806	2.17748	1.63063	2.17147	1	1	Csnk1a1	GO:0000087 GO:0000166 GO:0000278 GO:0000279 GO:0000280 GO:0000775 GO:0000776 GO:0000777 GO:0000779 GO:0000793 GO:0000902 GO:0003674 GO:0003824 GO:0004672 GO:0004674 GO:0005488 GO:0005515 GO:0005524 GO:0005575 GO:0005622 GO:0005623 GO:0005634 GO:0005654 GO:0005694 GO:0005737 GO:0005815 GO:0005847 GO:0005849 GO:0005856 GO:0006464 GO:0006468 GO:0006793 GO:0006796 GO:0006996 GO:0007049 GO:0007067 GO:…	map04310 map04340 map04710 map04711
shaggy	sgg	7e-29	126	005622	5.14603	5.35801	5.16558	5.2929	1	1	Casein kinase subunit II	GO:0000075 GO:0000166 GO:0003674 GO:0003824 GO:0004672 GO:0004674 GO:0005488 GO:0005515 GO:0005524 GO:0005575 GO:0005622 GO:0005623 GO:0005634 GO:0005737 GO:0006139 GO:0006351 GO:0006355 GO:0006464 GO:0006468 GO:0006793 GO:0006796 GO:0006807 GO:0006915 GO:0007049 GO:0007093 GO:0007154 GO:0007165 GO:0007166 GO:0007275 GO:0007346 GO:0008150 GO:0008152 GO:0008219 GO:0009058 GO:0009059 GO:0009889 GO:…	map03008 map04064 map04310 map04520 map04530 map04712 map05162 map05168 map05169	FBgn0264492
shaggy	sgg	4e-22	103	006192	2.90567	3.657	3.54408	3.65474	1	1	Serine/threonine-protein kinase prp4	GO:0000166 GO:0000375 GO:0000377 GO:0000398 GO:0003674 GO:0003824 GO:0004672 GO:0004674 GO:0005488 GO:0005524 GO:0005575 GO:0006139 GO:0006396 GO:0006397 GO:0006464 GO:0006468 GO:0006793 GO:0006796 GO:0006807 GO:0008150 GO:0008152 GO:0008380 GO:0009987 GO:0010467 GO:0010564 GO:0010948 GO:0016070 GO:0016071 GO:0016301 GO:0016310 GO:0016740 GO:0016772 GO:0016773 GO:0017076 GO:0019538 GO:0030554 GO:…
shaggy	sgg	3e-34	143	007296	0.0557087	0.098009	0.0441856	0.0286659	0.323923	1	Cdkl1	GO:0000166 GO:0000267 GO:0003674 GO:0003824 GO:0004672 GO:0004674 GO:0004693 GO:0005488 GO:0005524 GO:0005575 GO:0005622 GO:0005623 GO:0005625 GO:0005634 GO:0005737 GO:0006464 GO:0006468 GO:0006793 GO:0006796 GO:0007049 GO:0007275 GO:0007507 GO:0008150 GO:0008152 GO:0009987 GO:0016301 GO:0016310 GO:0016740 GO:0016772 GO:0016773 GO:0017076 GO:0019538 GO:0030554 GO:0032501 GO:0032502 GO:0032553 GO:…
shaggy	sgg	8e-26	114	007836	0.569226	0.192283	0.350769	0.349743	1	1	Cdk8	GO:0000082 GO:0000166 GO:0000278 GO:0003674 GO:0003824 GO:0004672 GO:0004674 GO:0004693 GO:0005488 GO:0005515 GO:0005524 GO:0005575 GO:0005622 GO:0005623 GO:0005634 GO:0005654 GO:0006139 GO:0006351 GO:0006355 GO:0006357 GO:0006464 GO:0006468 GO:0006793 GO:0006796 GO:0006807 GO:0006950 GO:0007049 GO:0007275 GO:0008150 GO:0008152 GO:0008353 GO:0009058 GO:0009059 GO:0009605 GO:0009889 GO:0009987 GO:…
shaggy	sgg	2e-51	199	012496	3.10957	3.72705	2.98428	3.88802	1	1	Glycogen synthase kinase-3 beta isoform 2	GO:0000166 GO:0001932 GO:0001934 GO:0003674 GO:0003824 GO:0004672 GO:0004674 GO:0005488 GO:0005515 GO:0005524 GO:0005575 GO:0005622 GO:0005623 GO:0005737 GO:0006464 GO:0006468 GO:0006793 GO:0006796 GO:0006928 GO:0007154 GO:0007165 GO:0007166 GO:0007275 GO:0008150 GO:0008152 GO:0009653 GO:0009887 GO:0009889 GO:0009893 GO:0009966 GO:0009968 GO:0009987 GO:0010556 GO:0010562 GO:0010604 GO:0010646 GO:…	map04012 map04062 map04110 map04310 map04340 map04360 map04510 map04660 map04662 map04711 map04722 map04728 map04910 map04916 map05010 map05160 map05162 map05164 map05166 map05169 map05200 map05210 map05213 map05215 map05217
shaggy	sgg	7e-24	109	014826	0.532817	1.0695	0.841288	1.25248	1	1	Cdk9	GO:0000003 GO:0000166 GO:0000975 GO:0001067 GO:0003006 GO:0003674 GO:0003676 GO:0003677 GO:0003723 GO:0003824 GO:0004672 GO:0004674 GO:0004693 GO:0005488 GO:0005515 GO:0005524 GO:0005575 GO:0005622 GO:0005623 GO:0005634 GO:0005654 GO:0005737 GO:0005829 GO:0006139 GO:0006259 GO:0006260 GO:0006261 GO:0006275 GO:0006281 GO:0006282 GO:0006351 GO:0006354 GO:0006355 GO:0006366 GO:0006368 GO:0006396 GO:…
smoothened	smo	7e-79	292	008487	0.863485	0.851458	0.817982	0.912412	1	1	Smoothened	GO:0003674 GO:0004871 GO:0004872 GO:0004888 GO:0004930 GO:0005575 GO:0005623 GO:0007154 GO:0007165 GO:0007166 GO:0007186 GO:0007275 GO:0008150 GO:0009987 GO:0016020 GO:0016021 GO:0023052 GO:0031224 GO:0032501 GO:0032502 GO:0038023 GO:0044425 GO:0044464 GO:0050789 GO:0050794 GO:0050896 GO:0051716 GO:0060089 GO:0065007	map04340 map05200 map05217	FBgn0003444
smoothened	smo	1e-38	158	011563	0.81086	0.308406	0.469725	0.536241	1	1	Frizzled homolog 2 (Drosophila)	GO:0000003 GO:0000139 GO:0000267 GO:0000902 GO:0000904 GO:0001503 GO:0001525 GO:0001553 GO:0001568 GO:0001570 GO:0001649 GO:0001654 GO:0001701 GO:0001736 GO:0001738 GO:0001775 GO:0001838 GO:0001841 GO:0001843 GO:0001890 GO:0001892 GO:0001932 GO:0001934 GO:0001942 GO:0001944 GO:0002009 GO:0002376 GO:0002520 GO:0002521 GO:0003001 GO:0003006 GO:0003007 GO:0003008 GO:0003149 GO:0003150 GO:0003151 GO:…	map04310 map04916 map05166 map05200 map05217	FBgn0001085
cubitus interruptus	ci	4e-30	130	004702	5.71316	5.81018	5.76266	5.96522	1	1	Putative zinc finger protein Pi-Zic	GO:0003674 GO:0003676 GO:0005488 GO:0005575 GO:0005622 GO:0005623 GO:0008270 GO:0043167 GO:0043169 GO:0044464 GO:0046872 GO:0046914		FBgn0003002
cubitus interruptus	ci	4e-48	190	005277	1.85896	1.49895	1.69886	1.61781	1	1	Hypothetical protein	GO:0003674 GO:0003676 GO:0005488 GO:0005575 GO:0005622 GO:0005623 GO:0008270 GO:0043167 GO:0043169 GO:0044464 GO:0046872 GO:0046914		FBgn0033782
cubitus interruptus	ci	4e-21	100	008508	2.17701	2.52339	2.56476	2.38106	1	1	Putative metal response element-binding transcription factor-1	GO:0003674 GO:0003676 GO:0003824 GO:0004620 GO:0004623 GO:0005488 GO:0005575 GO:0005622 GO:0005623 GO:0006629 GO:0006644 GO:0008150 GO:0008152 GO:0008270 GO:0009056 GO:0009987 GO:0016042 GO:0016298 GO:0016787 GO:0016788 GO:0019637 GO:0043167 GO:0043169 GO:0044237 GO:0044238 GO:0044255 GO:0044464 GO:0046872 GO:0046914 GO:0052689
cubitus interruptus	ci	6e-50	196	013001	0.302921	0.168924	0.412284	0.0698432	1	1	Putative zinc finger protein transcription factor lame duck	GO:0003674 GO:0003676 GO:0005488 GO:0005575 GO:0005622 GO:0005623 GO:0008270 GO:0043167 GO:0043169 GO:0044464 GO:0046872 GO:0046914		FBgn0039039
Wnt oncogene analog 5	Wnt5	1e-29	128	013415	1.02087	1.23258	1.84996	1.16974	1	1	Wingless-type MMTV integration site family member 5b	GO:0000902 GO:0000904 GO:0001568 GO:0001664 GO:0001701 GO:0001759 GO:0001837 GO:0001890 GO:0001892 GO:0001944 GO:0002053 GO:0003002 GO:0003007 GO:0003156 GO:0003205 GO:0003206 GO:0003209 GO:0003228 GO:0003230 GO:0003674 GO:0005102 GO:0005109 GO:0005110 GO:0005125 GO:0005488 GO:0005515 GO:0005575 GO:0005576 GO:0005578 GO:0005615 GO:0005622 GO:0005623 GO:0005737 GO:0005886 GO:0006355 GO:0006357 GO:…
Casein kinase Ialpha	CkIalpha	8e-82	300	014722	3.30144	1.83296	1.4633	2.35584	1	1	CSNK1A1 protein	GO:0000087 GO:0000166 GO:0000278 GO:0000279 GO:0000280 GO:0000775 GO:0000776 GO:0000777 GO:0000779 GO:0000793 GO:0000902 GO:0003674 GO:0003824 GO:0004672 GO:0004674 GO:0005488 GO:0005515 GO:0005524 GO:0005575 GO:0005622 GO:0005623 GO:0005634 GO:0005654 GO:0005694 GO:0005737 GO:0005815 GO:0005847 GO:0005849 GO:0005856 GO:0006464 GO:0006468 GO:0006793 GO:0006796 GO:0006996 GO:0007049 GO:0007067 GO:…	map04310 map04340
supernumerary limbs	slmb	2e-27	120	007311	0.832732	0.966117	0.914853	1.32117	1	1	F-box/WD repeat-containing protein 1A	GO:0000151 GO:0000209 GO:0001763 GO:0002009 GO:0003674 GO:0003824 GO:0004842 GO:0005488 GO:0005515 GO:0005575 GO:0005622 GO:0005623 GO:0006355 GO:0006464 GO:0006470 GO:0006508 GO:0006511 GO:0006793 GO:0006796 GO:0007275 GO:0008013 GO:0008150 GO:0008152 GO:0008283 GO:0009056 GO:0009057 GO:0009653 GO:0009888 GO:0009889 GO:0009890 GO:0009891 GO:0009892 GO:0009893 GO:0009894 GO:0009966 GO:0009987 GO:…
Wnt oncogene analog 6	Wnt6	1e-34	144	006034	0.0497865	0.0207448	0.0776588	0.0535507	0.462959	1	Wingless-type MMTV integration site family, member 6 precursor	GO:0000902 GO:0000904 GO:0001568 GO:0001664 GO:0001701 GO:0001759 GO:0001837 GO:0001890 GO:0001892 GO:0001944 GO:0002053 GO:0003002 GO:0003007 GO:0003156 GO:0003205 GO:0003206 GO:0003209 GO:0003228 GO:0003230 GO:0003674 GO:0005102 GO:0005109 GO:0005110 GO:0005125 GO:0005488 GO:0005515 GO:0005575 GO:0005576 GO:0005578 GO:0005615 GO:0005622 GO:0005623 GO:0005737 GO:0005886 GO:0006355 GO:0006357 GO:…
Wnt oncogene analog 6	Wnt6	2e-71	265	006036	1.61426	1.54943	1.61733	1.39946	1	1	Wingless-type MMTV integration site family, member 6 precursor	GO:0000902 GO:0000904 GO:0001568 GO:0001664 GO:0001701 GO:0001759 GO:0001837 GO:0001890 GO:0001892 GO:0001944 GO:0002053 GO:0003002 GO:0003007 GO:0003156 GO:0003205 GO:0003206 GO:0003209 GO:0003228 GO:0003230 GO:0003674 GO:0005102 GO:0005109 GO:0005110 GO:0005125 GO:0005488 GO:0005515 GO:0005575 GO:0005576 GO:0005578 GO:0005615 GO:0005622 GO:0005623 GO:0005737 GO:0005886 GO:0006355 GO:0006357 GO:…	map04310 map04340 map04916 map05166 map05200 map05217	FBgn0031902
Wnt oncogene analog 10	Wnt10	4e-29	125	011208	0.0813858	0.23561	0.0352254	0.169916	1	1	Wingless-type MMTV integration site family, member 7A (Fragment)	GO:0000003 GO:0000902 GO:0000904 GO:0001501 GO:0001568 GO:0001654 GO:0001664 GO:0001701 GO:0001759 GO:0001837 GO:0001890 GO:0001892 GO:0001944 GO:0002053 GO:0002062 GO:0002088 GO:0002376 GO:0002520 GO:0003002 GO:0003006 GO:0003007 GO:0003156 GO:0003205 GO:0003206 GO:0003209 GO:0003228 GO:0003230 GO:0003674 GO:0005102 GO:0005109 GO:0005110 GO:0005125 GO:0005488 GO:0005515 GO:0005575 GO:0005576 GO:…
Wnt oncogene analog 10	Wnt10	2e-25	113	011209	0.034482	0.0155294	0.043265	0	1	1	Wnt-1	GO:0000975 GO:0001067 GO:0001889 GO:0003674 GO:0003676 GO:0003677 GO:0005102 GO:0005488 GO:0005515 GO:0005575 GO:0005576 GO:0005578 GO:0005622 GO:0005623 GO:0005737 GO:0006355 GO:0006950 GO:0006974 GO:0007154 GO:0007162 GO:0007165 GO:0007166 GO:0007275 GO:0008150 GO:0008284 GO:0008593 GO:0009611 GO:0009653 GO:0009719 GO:0009725 GO:0009790 GO:0009887 GO:0009889 GO:0009891 GO:0009893 GO:0009966 GO:…
Rab23	Rab23	7e-22	100	005851	0.416658	0.788584	0.857131	0.653251	1	1	Rab1	GO:0000166 GO:0003674 GO:0005488 GO:0005525 GO:0005575 GO:0005622 GO:0005623 GO:0005737 GO:0005783 GO:0005794 GO:0006810 GO:0006886 GO:0007154 GO:0007165 GO:0007264 GO:0008104 GO:0008150 GO:0009987 GO:0015031 GO:0016192 GO:0017076 GO:0019001 GO:0023052 GO:0032553 GO:0032555 GO:0032561 GO:0033036 GO:0034613 GO:0035556 GO:0035639 GO:0043226 GO:0043227 GO:0043229 GO:0043231 GO:0044424 GO:0044444 GO:…
Rab23	Rab23	1e-38	155	006136	0.258992	0.348487	0.443223	0.337821	1	1	RAB23, member RAS oncoprotein family (Fragment)	GO:0000166 GO:0003674 GO:0005488 GO:0005525 GO:0006810 GO:0007154 GO:0007165 GO:0007264 GO:0008104 GO:0008150 GO:0009987 GO:0015031 GO:0017076 GO:0019001 GO:0023052 GO:0032553 GO:0032555 GO:0032561 GO:0033036 GO:0035556 GO:0035639 GO:0045184 GO:0050789 GO:0050794 GO:0050896 GO:0051179 GO:0051234 GO:0051716 GO:0065007	map04340
Rab23	Rab23	3e-24	108	014258	6.40389	6.55837	6.40613	6.49363	1	1	Rab13	GO:0000166 GO:0003674 GO:0005488 GO:0005525 GO:0005575 GO:0005622 GO:0005623 GO:0005737 GO:0005794 GO:0005886 GO:0006810 GO:0007154 GO:0007165 GO:0007264 GO:0008104 GO:0008150 GO:0009987 GO:0015031 GO:0016020 GO:0017076 GO:0019001 GO:0023052 GO:0032553 GO:0032555 GO:0032561 GO:0033036 GO:0035556 GO:0035639 GO:0043226 GO:0043227 GO:0043229 GO:0043231 GO:0044424 GO:0044444 GO:0044464 GO:0045184 GO:…	map04972
gasket	gskt	6e-27	118	001708	1.04165	0.805372	0.786775	0.900727	1	1	Cdc2	GO:0000003 GO:0000075 GO:0000077 GO:0000086 GO:0000087 GO:0000166 GO:0000278 GO:0000279 GO:0000280 GO:0003006 GO:0003674 GO:0003824 GO:0004672 GO:0004674 GO:0004693 GO:0005488 GO:0005515 GO:0005524 GO:0005575 GO:0005622 GO:0005623 GO:0005634 GO:0005737 GO:0005739 GO:0005829 GO:0005856 GO:0005874 GO:0006139 GO:0006259 GO:0006464 GO:0006468 GO:0006793 GO:0006796 GO:0006807 GO:0006915 GO:0006950 GO:…	map04110 map04114 map04115 map04540 map04914 map05168 map05169
gasket	gskt	2e-24	110	006363	4.77677	5.148	5.74405	5.1473	1	1	Serine/threonine-protein kinase prp4	GO:0000166 GO:0003674 GO:0003824 GO:0004672 GO:0004674 GO:0005488 GO:0005524 GO:0006464 GO:0006468 GO:0006793 GO:0006796 GO:0008150 GO:0008152 GO:0009987 GO:0016301 GO:0016310 GO:0016740 GO:0016772 GO:0016773 GO:0017076 GO:0019538 GO:0030554 GO:0032553 GO:0032555 GO:0032559 GO:0035639 GO:0043170 GO:0043412 GO:0044237 GO:0044238 GO:0044260 GO:0044267		FBgn0027587
Megalin	mgl	6e-48	191	005560	4.37006	5.02351	4.3	4.63106	1	1	Sortilin-related receptor	GO:0003674 GO:0004872 GO:0005575 GO:0005623 GO:0016020 GO:0016021 GO:0031224 GO:0044425 GO:0044464
Megalin	mgl	0	1167	005577	0.980429	0.240549	0.59379	0.472578	1	1	Low density lipoprotein receptor-related protein 2	GO:0000267 GO:0003674 GO:0004872 GO:0005488 GO:0005515 GO:0005575 GO:0005622 GO:0005623 GO:0005624 GO:0005626 GO:0005737 GO:0005768 GO:0005783 GO:0005794 GO:0005886 GO:0005903 GO:0005905 GO:0006766 GO:0006810 GO:0006897 GO:0006898 GO:0007275 GO:0007399 GO:0007417 GO:0007420 GO:0008150 GO:0008152 GO:0008283 GO:0009987 GO:0010324 GO:0012505 GO:0016020 GO:0016021 GO:0016023 GO:0016043 GO:0016044 GO:…
Megalin	mgl	0	2881	007798	3.81876	2.26215	2.76386	2.58277	1	1	Lipoprotein receptor-related protein 6	GO:0003674 GO:0004872 GO:0005575 GO:0005623 GO:0016020 GO:0016021 GO:0031224 GO:0044425 GO:0044464	map04340
Megalin	mgl	2e-23	110	009312	0	0.0307718	0.0222612	0.0241346	1	1	Adaptor-related protein complex 1, mu 2 subunit (Fragment)
Megalin	mgl	2e-148	523	011143	0.854282	0.38027	0.64696	0.701199	1	1	LRP4	GO:0001501 GO:0001654 GO:0001655 GO:0001667 GO:0001702 GO:0001763 GO:0001822 GO:0001932 GO:0001942 GO:0002009 GO:0003002 GO:0003674 GO:0004871 GO:0004872 GO:0004888 GO:0005102 GO:0005488 GO:0005509 GO:0005515 GO:0005575 GO:0005622 GO:0005623 GO:0005737 GO:0005886 GO:0006355 GO:0006357 GO:0006810 GO:0006897 GO:0006928 GO:0007154 GO:0007165 GO:0007166 GO:0007267 GO:0007275 GO:0007369 GO:0007389 GO:…
Megalin	mgl	8e-37	154	011478	0.600393	0.115093	0.238942	0.112547	1	1
Megalin	mgl	4e-33	142	016073	1.02983	1.73634	1.33571	0.694179	1	1	Nidogen	GO:0003674 GO:0005488 GO:0005509 GO:0007155 GO:0007160 GO:0008150 GO:0009987 GO:0022610 GO:0031589 GO:0043167 GO:0043169 GO:0046872		FBgn0026403
